## 1 *Resource Report*

# 2 3 **Comprehensive 2D and 3D phenotypic characterization of human** 4 **invasive lobular carcinoma cell lines**

5  
6 Nilgun Tasdemir<sup>1,2</sup>, Emily Bossart<sup>1,2</sup>, Zheqi Li<sup>1,2</sup>, Zhu Li<sup>3</sup>, Kevin M. Levine<sup>1,2</sup>, Britta M.  
7 Jacobsen<sup>4</sup>, George C. Tseng<sup>3,5</sup>, Nancy E. Davidson<sup>6,7</sup>, Steffi Oesterreich<sup>1,2,\*</sup>

8  
9 <sup>1</sup>Womens Cancer Research Center, University of Pittsburgh Medical Center (UPMC) Hillman Cancer  
10 Center (HCC), Magee Womens Research Institute, Pittsburgh, PA 15213, USA

11 <sup>2</sup>Department of Pharmacology & Chemical Biology, University of Pittsburgh, Pittsburgh, PA 15213,  
12 USA

13 <sup>3</sup>Department of Biostatistics, University of Pittsburgh, Pittsburgh, PA 15213, USA

14 <sup>4</sup>Dept. of Pathology, University of Colorado Anschutz Medical Campus, Aurora, CO

15 <sup>5</sup>Department of Computational & Systems Biology, Pittsburgh, PA 15213, USA

16 <sup>6</sup>Fred Hutchinson Cancer Center, Seattle, WA 98109, USA

17 <sup>7</sup>University of Washington, Seattle WA 98195, USA

18  
19 **Running Title:** Characterizing human invasive lobular carcinoma cell lines

20  
21 **Keywords:** invasive lobular carcinoma, ILC, 3D modeling, extracellular matrix, ECM

22  
23 **Financial Support:** The work is in part funded by a Department of Defense Breakthrough  
24 Fellowship Award to NT (BC160764), Shear Family Foundation grant and Susan G. Komen  
25 Leadership grant to SO (SAC160073), Breast Cancer Research Foundation grants to NED and  
26 SO, and a grant (#4100070287) with Pennsylvania Department of Health. The Pennsylvania  
27 Department of Health specifically disclaims responsibility for any analyses, interpretations or  
28 conclusions. EB is supported by a National Institutes of Health (NIH) Ruth L. Kirschstein Award  
29 (1F31CA203055-01). ZL is supported by the University of Pittsburgh John S. Lazo Cancer  
30 Pharmacology Fellowship. KML is supported by an individual fellowship from the NIH/NCI  
31 (5F30CA203095) The project used the UPMC Hillman Cancer Center Biostatistics and Tissue  
32 and Research Pathology Services (TARPS) Cores, in part supported by P30CA047904.

33  
34 **\*Corresponding Author:**

35 Steffi Oesterreich, PhD

36 [oesterreichs@upmc.edu](mailto:oesterreichs@upmc.edu)

37 Phone: 4126418555

38 Women's Cancer Research Center

39 UPMC Hillman Cancer Center

40 204 Craft Avenue

41 Pittsburgh, PA 15213, USA

42 **Conflict of interest statement:** None to report

43

44

45

46

47 **Authors' Contributions**

48

49 **Conception and design:** N. Tasdemir, NE. Davidson, S. Oesterreich

50 **Development of methodology:** N. Tasdemir, L. Zhu, GC. Tseng, S. Oesterreich

51 **Acquisition of data (performed experiments, processed data, etc.):** N. Tasdemir, E. Bossart, Z.

52 Li, Z. Li

53 **Analysis and interpretation of data (e.g. biological interpretation, statistical analysis,**

54 **computational analysis):** N. Tasdemir, Z. Li, KM. Levine, NE. Davidson, S. Oesterreich

55 **Writing, review and/or revision of the manuscript:** N. Tasdemir, Z. Li, KM. Levine, BM.

56 Jacobson, GC. Tseng, NE. Davidson, S. Oesterreich

57 **Study supervision:** NE. Davidson and S. Oesterreich

58

59

60

61

62

63 **Word count:** 5,000 (main text)

64 **Total number of Figures:** 7 main figures, 6 supplementary figures

65 **Total Number of Tables:** 3 supplementary tables

66 **Total Number of References:** 50

67

68

69

70

71

72

73

74

75

76

77

78

79

80

81

82

83 **Abstract** (250 words)

84

85 Invasive lobular carcinoma (ILC) is the second most common subtype of breast cancer following  
86 invasive ductal carcinoma (IDC) and characterized by the loss of E-cadherin-mediated adherens  
87 junctions. Despite displaying unique histological and clinical features, ILC still remains a  
88 chronically understudied disease with limited knowledge on the available laboratory research  
89 models. To this end, herein we report a comprehensive 2D and 3D phenotypic characterization of  
90 four Estrogen Receptor-positive human ILC cell lines - MDA-MB-134, SUM44, MDA-MB-330  
91 and BCK4. Compared to the IDC cell lines MCF7, T47D and MDA-MB-231, ultra-low  
92 attachment culture conditions revealed a remarkable anchorage-independence ability that was  
93 unique to the ILC cells, a feature not evident in soft agar gels. 3D Collagen I and Matrigel  
94 culture indicated a generally loose morphology for the ILC cell lines, which exhibited differing  
95 preferences for adhesion to ECM proteins in 2D. Furthermore, ILC cells had limited migration  
96 and invasion ability in wound-scratch and transwell assays with the exception of haptotaxis to  
97 Collagen I. Transcriptional comparison of the cell lines confirmed the decreased cell  
98 proliferation and E-cadherin-mediated intercellular junctions in ILC, while uncovering the  
99 induction of novel pathways related to cyclic nucleotide phosphodiesterase activity, ion  
100 channels, drug metabolism and alternative cell adhesion molecules such as N-cadherin, some of  
101 which were also differentially regulated in ILC versus IDC tumors. Altogether, these studies will  
102 serve as an invaluable resource for the breast cancer research community and facilitate further  
103 functional discoveries towards understanding ILC, identifying novel drug targets and ultimately  
104 improving the outcome of patients with ILC.

105

106

107

108

109

110

111

112

113

114

115

116

117

118

119

120

121

122

123

124 **Introduction**

125

126 Invasive lobular carcinoma (ILC) is the second most common type of breast cancer following  
127 invasive ductal carcinoma (IDC), accounting for 10-15% of all cases (1). At an annual number of  
128 ~25-38,000, which is higher than ovarian cancer or melanoma, ILC is the 6<sup>th</sup> most common  
129 cancer among women in US (2). Histologically IDC tumors form palpable masses or lumps,  
130 while ILCs grow as small, dyscohesive cells in a single-file pattern (1,3). This unique growth  
131 pattern makes mammographic detection and surgical removal of ILC difficult, complicating  
132 breast conservation (3). In addition, compared to IDCs, ILCs present more frequently as multi-  
133 centric and bilateral and with metastases to ovaries, peritoneum and gastrointestinal tract (1,4).  
134 Paradoxically, while patients with ILC display favorable prognostic and predictive factors  
135 (Estrogen Receptor [ER]-positive, Progesterone Receptor-[PR] positive, HER2-negative, low  
136 Ki67 index) and are mostly treated with endocrine therapy, they exhibit more long-term  
137 recurrences compared to patients with IDC, indicative of endocrine resistance (4,5).

138

139 Despite its distinctive histological and clinical features, ILC has remained a gravely understudied  
140 subtype of breast cancer. The most characteristic feature of ILC is the lack of E-cadherin-  
141 mediated adherens junctions, thought to be largely responsible for its single-file growth pattern  
142 (6). This hallmark E-cadherin loss, found in 95% of all ILC tumors versus in only 7% of IDCs,  
143 occurs through truncating mutations and loss-of-heterozygosity (6-8). Our knowledge of ILC as  
144 a unique subtype of breast cancer is only recently emerging with comprehensive reports from big  
145 consortia such as The Cancer Genome Atlas (TCGA) (7) and Rational Therapy for Breast Cancer  
146 (RATHER) (9). Multi-omics profiling of human tumors has begun to reveal candidate disease  
147 drivers such as HER2, HER3, FOXA1 and PIK3CA mutations, PTEN loss and ESR1  
148 amplifications, events more frequently observed in ILC compared to IDC (7,9,10). However, the  
149 functional validation of these potential drivers is hindered by the availability of few ER-positive  
150 human ILC cell lines for use in the laboratory and limited knowledge on their biological  
151 phenotypes. Thus there is urgent need to develop additional cell line models, as well as  
152 thoroughly characterizing the cellular behaviors of the existing ones.

153

154 Our laboratory has recently reported the first profiling of ER function and endocrine response in  
155 ER-positive human ILC cell lines (11). Here we go one step beyond and characterize their  
156 growth and morphologies in 3D environments such as in ultra-low attachment (ULA) culture  
157 (12), soft agar (13), and within/on top of ECM proteins (14,15), as well as their adhesion  
158 properties in 2D (16). Using IDC cell lines for comparison, we probe their migration potential in  
159 response to both soluble attractants in chemotaxis assays (17) and to substrate bound ECM  
160 proteins in haptotaxis assays (18). In addition, we report on their abilities to invade Collagen I  
161 and Matrigel, as well as assessing their use of amoeboid invasion in non-cross-linked Collagen I  
162 gels (19,20). Comparison of transcriptional profiling data of ER-positive human ILC and IDC  
163 cell lines identified a number of clinically relevant genes and pathways that provide important



164 insights into the sub-type specific gene expression programs likely responsible for their divergent  
165 biological phenotypes. Combined, our studies serve as invaluable resource for modeling ILC in  
166 the laboratory and pave the way for a promising direction of research for ILC biology towards  
167 new discoveries.

168  
169  
170  
171  
172  
173  
174  
175  
176  
177  
178  
179  
180  
181  
182  
183  
184  
185  
186  
187  
188  
189  
190  
191  
192  
193  
194  
195  
196  
197  
198  
199  
200  
201  
202  
203

204 **Materials and Methods**

205

206 ***Cell culture***

207

208 MDA-MB-134-VI (MDA-MB-134), MDA-MB-330, MCF-7, T47D and MDA-MB-231 were  
209 obtained from the American Type Culture Collection. SUM44PE (SUM44) was purchased from  
210 Asterand and BCK4 was kindly provided by Britta Jacobsen, University of Colorado Anschutz,  
211 CO. Cell lines were maintained in the following media (Life Technologies) with 10% FBS:  
212 MDA-MB-134 and MDA-MB-330 in 1:1 DMEM:L-15, MCF7 and MDA-MB-231 in DMEM,  
213 T47D in RPMI, BCK4 in MEM with non-essential aminoacids (Life Technologies) and insulin  
214 (Sigma-Aldrich). SUM44 was maintained as described (11) in DMEM-F12 with 2% charcoal  
215 stripped serum and supplements. Cell lines were routinely tested to be mycoplasma free,  
216 authenticated by the University of Arizona Genetics Core by Short Tandem Repeat DNA  
217 profiling and kept in continuous culture for <6 months. PIK3CA plasmids in pBABE (Addgene)  
218 and PTEN shRNAs in pMLPE (a kind gift from Scott W. Lowe, Memorial Sloan Kettering  
219 Cancer Center, NY) were packaged as previously described (21) and cells were selected with  
220 1µg/ml puromycin (Life Technologies). shRNA sequences are provided in Supplementary Table  
221 1.

222

223 ***Immunoassays and trichrome staining***

224

225 Western blots were performed as previously described (22) using 5% milk powder for blocking  
226 and developed using ECL (Sigma-Aldrich). For immunofluorescence, cells grown on coverslips  
227 were fixed with 4% paraformaldehyde, permeabilized and blocked with 5% Normal Goat Serum.  
228 Coverslips were incubated with antibodies, washed and mounted using DAPI- containing media  
229 (Thermo Fisher Scientific). Slides were imaged using a Nikon A1 advanced confocal system.  
230 Details of the antibodies used are included in Supplementary Table 1. Masson's Trichrome  
231 (Sigma-Aldrich) staining was performed on a tissue microarray using manufacturer's protocol  
232 without the acetic acid step after the aniline blue.

233

234 ***Anchorage-independence and stemness assays***

235

236 For 2D and ULA growth assays, ILC (15,000/96-well; 300,000/6-well) and IDC (5,000/96-well;  
237 100,000/6-well) cells were seeded in regular (Thermo Fisher Scientific) or ULA (Corning Life  
238 Sciences) 96-well plates and assayed using CellTiter-Glo (Promega) on a Promega GloMax plate  
239 reader. Soft agar assays with ILC (50,000/plate) and IDC (10,000/plate) cells were performed in  
240 35-mm plates (Thermo Fisher Scientific) as previously described (13,23). For mammosphere  
241 assays, ILC (60,000/well) and IDC (20,000/well) cells were seeded in 6-well ULA plates  
242 (Corning Life Sciences) as previously described (24) in 1:1 DMEM/Ham's F-12 media with 20  
243 ng/mL bFGF (BD Biosciences), 20 ng/mL EGF (BD Biosciences), B27 (Gibco), 2.5 mL

244 Penicillin/Streptomycin, and 4 µg/mL Heparin (Sigma-Aldrich). All images were taken on an  
245 Olympus IX83 inverted microscope. For stem cell expression experiments, cells were stained  
246 with the indicated antibodies and analyzed on an LSRII flow cytometer (BD Biosciences).  
247 Gating was performed using the BD FACS Diva Software and isotype antibody stainings. Details  
248 of the antibodies used are included in Supplementary Table 1.

249

### 250 ***3D ECM assays***

251

252 ILC (15,000/well) and IDC (5,000) cells were embedded in rat-tail Collagen I (Corning Life  
253 Sciences) at 4mg/ml in 24-well plates following manufacturer's recommendations. For Matrigel  
254 (BD Biosciences) assays, ILC (5,000/well) and IDC (4,000/well) cells were seeded into single  
255 wells of 8-well LabTek Chamber Slides (Thermo Fisher Scientific) as previously described (14).  
256 Colonies were imaged on an Olympus IX83 inverted microscope.

257

### 258 ***ECM adhesion assays***

259

260 ILC (100,000-200,000/well) and IDC (50,000-10,000/well) cells were seeded into 96-well plates  
261 with the indicated coatings (Corning Life Sciences) following detachment with PBS containing  
262 2mM EDTA. After incubation, plates were imaged on an Olympus IX83 inverted microscope,  
263 washed twice with PBS and quantified using FluoReporter dsDNA kit (Life Technologies)  
264 following manufacturer's protocol.

265

### 266 ***Migration and invasion assays***

267

268 Wound-scratch assays were performed as previously described (25,26) using the IncuCyte Zoom  
269 Live Cell Imaging System (Essen Bioscience). PMA (Sigma-Aldrich) was used at 100 nM. For  
270 transwell experiments, cells were serum starved overnight, plated into 8 µm inserts (Thermo  
271 Fisher Scientific and Cell Biolabs) and quantified using Crystal violet following manufacturer's  
272 protocol. Images of inserts were taken on an Olympus SZX16 dissecting microscope.

273

### 274 ***Differential gene expression, pathway and survival analyses***

275

276 RNA-Sequencing data of the cell lines was obtained from Marcotte et al. (27). The R package  
277 DESeq2 was used for differential expression analysis and pathway enrichment analysis was  
278 implemented using KEGG, BIOCARTA, REACTOME and KEGG databases as previously  
279 described (22). Survival analysis was performed using the METABRIC dataset (28) as  
280 previously described (22).

281

282

283

284 ***Statistical analysis***

285  
286 Data analysis was performed using GraphPad Prism. Data is presented as mean +/- standard  
287 deviation. Statistical tests used for each figure are indicated in the respective figure legends.  
288

289 ***Supplementary methods***

290  
291 Detailed methods are described in Supplementary Text.  
292

293  
294  
295  
296  
297  
298  
299  
300  
301  
302  
303  
304  
305  
306  
307  
308  
309  
310  
311  
312  
313  
314  
315  
316  
317  
318  
319  
320  
321  
322  
323

324 **Results**

325

326 **Hormone receptor and adherens junction status**

327

328 In this study, we focused on four ER-positive human ILC cell lines - MDA-MB-134, SUM44,  
329 MDA-MB-330 and BCK4 and utilized the IDC cell lines MCF7, T47D and MDA-MB-231 for  
330 comparative studies. As seen in **Fig. 1A**, Western blotting confirmed ER expression in all cell  
331 lines, except for the ER-negative MDA-MB-231 cells (29). Of note, although there are  
332 conflicting reports on the ER status of MDA-MB-330 cells (29,30), they displayed abundant ER  
333 levels in our hands. Only BCK4 and T47D had detectable PR expression at these exposure  
334 conditions. As expected, E-cadherin was absent from MDA-MB-134, SUM44, which harbor  
335 *CDH1* truncating mutations (30), from BCK4 cells, as well as from MDA-MB-231 cells, in  
336 which the *CDH1* promoter is hypermethylated (31).

337

338 Consistent with the down-regulation and/or mislocalization of other junction components in the  
339 absence of E-cadherin (32,33),  $\beta$ -catenin expression was absent from MDA-MB-134, SUM44  
340 and BCK4 cells – a result different from that in MDA-MB-231 cells, which retained  $\beta$ -catenin  
341 expression without E-cadherin. Interestingly, MDA-MB-330 cells, which harbor a bi-allelic,  
342 truncating *CTNNA1* mutation (30), still expressed E-cadherin and  $\beta$ -catenin in the absence of  $\alpha$ -  
343 catenin. In contrast, p120-catenin (p120) was detected in all cell lines with the weakest  
344 expression in BCK4 cells, which also exhibited lower  $\alpha$ -catenin levels. Co-immunofluorescence  
345 staining confirmed the absence of functional E-cadherin in ILC cell lines, which was  
346 mislocalized to the cytoplasm in MDA-MB-330 cells (**Fig. 1B**; top). Similarly, p120 was also  
347 largely cytoplasmic in ILC cell lines and in MDA-MB-231 cells, unlike its normal membranous  
348 co-localization with E-cadherin in IDC cells (**Fig. 1B**; bottom). Collectively, these data confirm  
349 the absence of functional adherens junctions in ILC cells.

350

351

352 **Anchorage-independence ability**

353

354 Next we assessed the anchorage-independence ability of ILC cell lines by growing them in ULA  
355 conditions, which forces them into a suspension culture (12). ILC cell lines exhibited a  
356 dyscohesive, scattered morphology in 2D plates consistent with their lack of adherens junctions,  
357 while growing as large floating clusters in ULA plates (**Fig. 2A**; top). In contrast, MCF7 and  
358 T47D cells were more cohesive in 2D and formed tight spheres in ULA (**Fig. 2A**; bottom).  
359 Despite having overall slower proliferation rates compared to the IDC cells, the ILC cell lines  
360 had a remarkable ability to grow equally well in 2D and ULA plates, with BCK4 showing the  
361 least robust ULA phenotype (**Fig. 2B**). Importantly, this anchorage-independence was unique to  
362 the ILC cells, as the IDC cell lines had much poorer growth in ULA versus 2D culture.  
363 Interestingly, while MDA-MB-231 cells with no adherens junctions displayed a loose ULA

364 morphology more similar to ILC than IDC cells, they had the poorest ULA growth of all the IDC  
365 cell lines.

366  
367 Given the superior anchorage-independent growth of ILC cell lines compared to IDC, we also  
368 assessed their ability to form mammospheres, which are similarly grown in ULA plates but with  
369 a selective media that enriches for stem-like cells (24). Assessment of stemness in the ILC cell  
370 lines was also of interest to us given the higher expression of stem cell markers such as  
371 ALDH1A1 in ILC versus IDC tumors (34,35). Despite their robust growth in ULA conditions,  
372 ILC cell lines formed poorly defined, loose mammospheres that were difficult to quantify, unlike  
373 the tighter MCF7 and T47D spheres (**Supplementary Fig. S1A**). Flow cytometric analysis of  
374 stem cell markers similarly did not identify a putative CD24<sup>low</sup>/CD44<sup>high</sup> or CD49<sup>high</sup>/EPCAM<sup>low</sup>  
375 stem cell population in the ILC cell lines (**Supplementary Fig. S1B-C**). Although such a  
376 population was present in MDA-MB-231 cells, this cell line did not form mammospheres as  
377 robustly as MCF7 and T47D cells. Consistent with previous literature, these results indicate poor  
378 mammosphere formation in cells with disrupted adherens junctions and a discordance between  
379 stem cell expression and mammosphere formation ability (36).

380  
381 Another form of anchorage-independence is the ability to grow in suspension in soft agar gels  
382 (13). In general, ILC cell lines exhibited limited, dyscohesive growth in this semi-solid medium,  
383 with BCK4 cells forming the smallest colonies (**Fig. 3A**; top). The ILC growth was similar to the  
384 growth of MCF7 and T47D cells, the latter displaying a tighter morphology. As expected, MDA-  
385 MB-231 cells formed the most robust soft agar colonies, serving as a positive control.  
386 Altogether, these assays indicate that ILC cells exhibit a unique anchorage-independence ability  
387 in ULA conditions, a phenotype not replicated in soft agar or mammosphere culture.

388  
389  
390 **3D ECM growth and cell-matrix interactions**

391  
392 In tissues, ILC tumors grow as a single-file of cells within a dense layer of stroma rich in ECM  
393 (1,6). This phenomenon can be visualized by staining human tumors with Masson's Trichrome,  
394 which clearly demonstrates higher levels of collagen fibers in ILC compared to IDC  
395 (**Supplementary Fig. S2**). However, the 3D ECM growth of human ILC cell lines has not  
396 previously been systematically analyzed. Therefore, we first embedded ILC cell lines in thick  
397 Collagen I gels, where MDA-MB-134 and SUM44 cells exhibited the most robust growth, while  
398 MDA-MB-330 cells displayed a looser morphology and BCK4 formed the smallest colonies  
399 (**Fig. 3A**). Similar results were obtained when the cells were either embedded within or cultured  
400 on top of Matrigel, displaying a "grape-like" morphology previously described for cells with  
401 poor cell-cell adhesion (37). In contrast, MCF7 and T47D cells formed very tight colonies in all  
402 ECM environments (**Fig. 3B**). Interestingly, MDA-MB-330 cells exhibited protrusive structures

403 in Matrigel culture (**Fig. 3A**), which are more characteristic of MDA-MB-231 cells with a  
404 “stellate” morphology and known invasive potential (**Fig. 3B**) (37).

405

406 In addition to growing cells within 3D gels, we also assayed the adhesion of cells to ECM  
407 proteins in 2D to gain a deeper understanding of their cell-matrix interactions (16). To this end,  
408 we seeded ILC and IDC cell lines onto plates coated with Collagen I, Collagen IV, Fibronectin,  
409 Laminin or Matrigel in serum free media. We also utilized uncoated plates for comparison and  
410 bovine serum albumin (BSA) coated plates as negative control for background adhesion levels.  
411 While a 2-hour incubation indicated a low level of overall binding in ILC cell lines, especially in  
412 MDA-MB-134 and SUM44 cells (**Supplementary Fig S3A**), a 16 hour-incubation resulted in  
413 more efficient binding and varying cell morphologies on different matrices (**Fig. 4A** and  
414 **Supplementary Fig. S3B**). The ECM protein most preferred for binding in general was  
415 Collagen I (**Fig. 4B**), on which most cells displayed prominent adhesive protrusions (**Fig. 4A**),  
416 followed by Collagen IV and Matrigel.

417

418 Of the ILC cell lines analyzed, MDA-MB-134 cells displayed a unique matrix interaction profile,  
419 with a less overall adhesion to ECM proteins than to uncoated plates and no visible adhesive  
420 protrusions on any matrix. Interestingly, unsupervised clustering of the ILC and IDC cell lines  
421 using publicly available transcript profiling data (27) showed that MDA-MB-134 cells clustered  
422 separately from the other ILC cell lines, displaying a unique expression pattern of genes  
423 encoding both integrins (**Supplementary Fig. S3C**) and matrix metalloproteinases (MMPs)  
424 (**Supplementary Fig. S3D**), which are well known mediators of cell-matrix adhesion (16).  
425 Combined, these data indicate that ILC cell lines have differing morphologies in 3D ECM gels  
426 and divergent adhesive properties on matrix proteins.

427

428

### 429 **Migration and invasion potential**

430

431 Next we assessed cell migration employing the commonly used wound-scratch assay, in which a  
432 gap (“a wound”) is introduced into the middle of a monolayer to induce directional movement of  
433 cells from the wound edges (17,25). Using the IncuCyte live-cell imaging system and capturing  
434 images of cells every 4 hours, we observed very limited basal migration in the ILC cell lines  
435 (**Fig. 5A**; left). This was in stark contrast to the IDC cells (**Fig. 5A**; right), which completely  
436 closed the wound in as early as 24 hours (MDA-MB-231). To exogenously induce cell  
437 migration, we treated the cells with phorbol myristate acetate (PMA), which activates the PKC  
438 pathway and downstream actin cytoskeleton reorganization (38). PMA treatment clearly  
439 triggered migratory protrusions at the edges of the wound in MCF7 cells (**Fig. 5B**; right) and  
440 substantially increased their migration rate (**Fig. 5C**; right). In contrast, however, despite  
441 inducing protrusions in the otherwise-round ILC cell lines (**Fig. 5B**; left), PMA had limited



442 effect on their movement (**Fig. 5C**; left). While the strongest PMA effect was in BCK4, this cell  
443 line still failed to close the wound after 72 hours.

444

445 As an alternative to the wound-scratch assay, we next utilized transwell Boyden chambers to  
446 assess migration and invasion (17). As expected, the highly migratory MDA-MB-231 cells  
447 exhibited substantial chemotaxis to FBS, while MCF7 and T47D cell were weakly migratory  
448 (**Fig. 6A**). However, the ILC cell lines exhibited very limited migration to FBS in this assay.  
449 Given the ECM-rich stroma of ILC tumors (1,6) (see **Supplementary Fig. S2**), we also assayed  
450 migration to substrate bound ECM in haptotaxis experiments (18), in which the undersides of the  
451 inserts were coated with a thin layer of Collagen I. Interestingly, SUM44 and MDA-MB-330  
452 cells displayed abundant haptotaxis to Collagen I over BSA in this assay (**Fig. 6B**), despite no  
453 chemotaxis to FBS (see **Fig. 6A**). This result was different from MCF7 and MDA-MB-231 cells,  
454 which exhibited Collagen I haptotaxis (**Fig. 6B**) but also chemotaxis to FBS (see **Fig. 6A**),  
455 highlighting the unique requirement of matrix only by ILC cells for migration. However, this  
456 finding did not extend to BCK4 or MDA-MB-134 cells, which did not migrate substantially in  
457 either assay (**Fig. 6A-B**), with the phenotype of the latter being consistent with its weak ECM  
458 adhesion (see **Fig. 4**).

459

460 Almost half of all human ILC tumors harbor activating, hotspot mutations in PIK3CA and 13%  
461 have PTEN loss due to inactivating mutations or deletions (7). These alterations are known to  
462 activate downstream Akt signaling, which can induce cell migration and invasion (39). While  
463 MCF7 and T47D both harbor PIK3CA mutations, human ILC cell lines are wild type for  
464 PIK3CA and PTEN (27). We therefore overexpressed PIK3CA mutants and knocked down  
465 PTEN in MDA-MB-134 cells to potentially augment their migration ability. Interestingly,  
466 compared to the respective controls, only the H1047R but not the E545K mutation activated  
467 downstream Akt signaling, along with all four PTEN shRNAs in MDA-MB-134 cells, which  
468 was different from the highly active MCF7 cells that harbor the endogenous E545K mutation  
469 (**Supplementary Fig. 4A**). However, when assayed in either transwell Boyden chambers  
470 (**Supplementary Fig. 4B-C**) or wound-scratch assays (**Supplementary Fig. 4D**), none of the  
471 tested alterations alone were sufficient to induce cell migration in MDA-MB-134 cells.

472

473 Using the transwell Boyden chambers, we also assayed the invasion capacity of human ILC cell  
474 lines. When plated in top chambers coated on the inside with either acid-extracted cross-linked  
475 Collagen I (**Fig. 6C**) or Matrigel (**Fig. 6D**), the highly invasive MDA-MB-231 cells were the  
476 only cell line that exhibited robust invasion; while MCF7 and T47D were weakly invasive. The  
477 ILC cell lines, however, had limited invasion of either Collagen I or Matrigel in response to FBS  
478 in bottom chambers. In addition to mesenchymal invasion of cross-linked ECM proteins, cells  
479 can also exhibit amoeboid invasion by squeezing through the pores in non-cross-linked ECM  
480 (19,20). Given their morphological similarity to the small, round cells of melanoma and non-  
481 small cell lung cancer that utilize amoeboid invasion, we also assayed this type of invasion in

482 ILC cell lines using transwell chambers coated with pepsin-extracted Collagen I. In contrast to  
483 the invasive MDA-MB-231 cells, however, ILC and IDC cell lines exhibited limited amoeboid  
484 invasion in this assay (**Supplementary Figure 5**). Altogether, these results suggest that ILC cell  
485 lines exhibit limited migration and invasion in traditional laboratory assays with the exception of  
486 haptotaxis to Collagen I.

487

488

### 489 **Transcriptional comparison of ILC and IDC cell lines and tumors**

490

491 Our comprehensive analysis of the 2D and 3D phenotypes of human ILC cell lines clearly  
492 demonstrated unique biological properties. In order to delineate the gene expression programs  
493 that may underlie the divergent cellular phenotypes of the ILC and IDC cell lines, we performed  
494 transcriptional comparison analyses using publicly available data sets (27), which covered all of  
495 the cell lines used in this study except for BCK4. Importantly, of the ILC cell lines with available  
496 data, we only focused on MDA-MB-134 and SUM44 cells in order to capture the differential  
497 expression of E-cadherin in ILC versus IDC and therefore excluded MDA-MB-330 cells that do  
498 not harbor the hallmark *CDH1* mutation. In addition, ER-negative MDA-MB-231 cells were also  
499 excluded from the analyses to ensure comparison between cell lines belonging to the same  
500 molecular subtype (i.e. luminal), leaving MCF7 and T47D.

501

502 Despite the small number of cell lines analyzed, unsupervised hierarchical clustering of the ILC  
503 and IDC cells clustered MDA-MB-134 and SUM44 closer to each other and away from MCF7  
504 and T47D (**Supplementary Fig. S6A**). Differential expression analysis, based on a fold-change  
505 cut-off value of 1.5 and false discovery rate (FDR) value of 0.05, identified 320 genes that were  
506 expressed higher in ILC versus IDC cell lines and 387 that were expressed lower (**Fig. 7A** and  
507 **Supplementary Table 2**). Pathway enrichment analysis on the differentially expressed genes  
508 (**Fig. 7B** and **Supplementary Table 3**) indicated upregulated transmembrane protein tyrosine  
509 kinase pathway in ILC cell lines, consisting of genes such as *FGFR1*, a known amplified  
510 oncogene in ILC (40). Additional pathways revealed from this analysis included ion channel  
511 activity, tyrosine metabolism, biological oxidation, cyclic nucleotide phosphodiesterase activity,  
512 drug metabolism cytochrome P450 and alternative cell adhesion, with genes such as *CDH2*.  
513 Conversely, the downregulated pathways confirmed the decreased intercellular junctions and  
514 proliferation in ILC versus IDC cell lines (6,30), as well as extending to further categories such  
515 as interferon signaling, amyloids, RNA Pol I transcription, extracellular structure and  
516 organization, and focal adhesions, with the last category mediating cell-matrix interactions (**Fig.**  
517 **7C** and **Supplementary Table 3**).

518

519 We recently reported a transcriptomic comparison of ILC and IDC tumors from the TCGA (7)  
520 and METABRIC (28) cohorts (22). We therefore wished to determine to what extent the *in vitro*  
521 transcriptional differences from the cell lines correlated with their *in vivo* counterpart from the

522 tumors. To this end, we initially performed a principal component (PCA) analysis of all the  
523 TCGA ER-positive, luminal A ILC (n=174) and IDC (n=774) tumors used in our original study  
524 (22) and the four cell lines used herein (MDA-MB-134, SUM44, MCF7, T47D), which  
525 somewhat separated the ILC and IDC tumors but clustered all the cell lines separately and away  
526 from the tumors (**Supplementary Fig. 6B**). Nevertheless, overlap of the differentially expressed  
527 genes between ILC and IDC tumors (22) and those between ILC and IDC cell lines  
528 (**Supplementary Table 2**) identified 14 upregulated and 17 downregulated genes, the latter  
529 including *CDH1* (**Fig. 7D-E**). The query of these genes in the METABRIC dataset (28) revealed  
530 that higher expression of *PPFIBP2*, as seen in cell lines and tumors from ILC versus IDC, was  
531 significantly associated with worse disease-specific survival in ILC but not in IDC (**Fig. 7F**;  
532 top). Similarly, lower expression of *PLOD2*, as seen in ILC versus IDC tumors and cell lines,  
533 exhibited a significant association with worse disease-specific survival in ILC but not in IDC  
534 (**Fig. 7F**; bottom). Collectively, these data highlight the sub-type specific, clinically relevant  
535 gene expression programs that may account for the divergent biological phenotypes between ILC  
536 and IDC cell lines and should be more deeply explored.

537  
538  
539  
540  
541  
542  
543  
544  
545  
546  
547  
548  
549  
550  
551  
552  
553  
554  
555  
556  
557  
558  
559  
560  
561  
562  
563  
564

565 **Discussion**

566

567 ILC is a special subtype of breast cancer with distinct histological and clinical features from the  
568 more common subtype IDC (1). Despite the clear need to expand our understanding of the  
569 unique biology of ILC, there are currently few laboratory models available for research and a  
570 huge gap in our knowledge on their biological properties beyond endocrine response (11). Our  
571 study is the first comprehensive report on the 2D and 3D phenotypic characterization of four ER-  
572 positive human ILC cell lines. Using a number of IDC cell lines for comparison, herein we  
573 profiled their 2D and 3D growth, matrix interactions, migratory and invasive properties and sub-  
574 type specific gene expression programs. Although a number of ER-negative ILC cell lines are  
575 available (30), we limited our focus to the ER-positive models given that approximately 90% of  
576 ILC tumors are of this molecular subtype (1,6). Interestingly, despite the controversial ER status  
577 of MDA-MB-330 cells (29,30), we included them in our studies since in our hands they  
578 exhibited abundant expression of ER, the functionality of which needs further investigation.

579

580 The unique anchorage-independence ability we observed in the human ILC cell lines suggests  
581 resistance to anoikis - detachment induced apoptosis - , and is in agreement with findings in  
582 mouse cell lines from a transgenic model of ILC (41). Given the well-accepted role of  
583 anchorage-independence in metastasis (42), our interesting result may have important clinical  
584 implications. While ILC and IDC tumors both progress to the stage of disseminated disease,  
585 patients with ILC present more often with long-term endocrine-resistant recurrences (1,4,5). The  
586 ability to survive in the absence of attachment to matrix may allow ILC cells to stay dormant in  
587 foreign ECM environments for extended periods of time prior to re-growth and colonization.  
588 Interestingly, our results indicated that this anchorage-independence ability was unique to the  
589 ILC cells in the ULA settings and not evident in soft agar or mammosphere culture, suggesting a  
590 context-dependent phenotype. Importantly, based on our data, testing of therapeutic agents for  
591 ILC in future studies in both 2D and ULA conditions might allow uncoupling of potential effects  
592 on cell proliferation versus metastasis.

593

594 Our 3D ECM experiments revealed generally loose, poorly defined colonies for the ILC cell  
595 lines, which is not surprising given their defect in adherens junctions (6). Nevertheless, different  
596 cell lines still displayed varying morphologies and abilities to grow in these settings. Such a  
597 divergent pattern was especially evident in the ECM adhesion experiments, where MDA-MB-  
598 134 generally exhibited a less preference for interacting with matrix proteins. Our *in silico*  
599 analysis revealed a putative list of integrins and MMP proteins that may account for this  
600 phenotype. Interestingly, none of the ILC cell lines analyzed assumed their native, *in vivo* single-  
601 file morphology within or on top of 3D ECM gels on 2D matrix coatings. Since the single-file  
602 pattern of the cancer cells in ILC tumors may provide important spatial and polarity cues, forcing  
603 ILC cell lines to grow in linear patterns using platforms such as micro-patterned ECM surfaces  
604 (43) may allow better modeling of ILC in the laboratory. Based on our data, the poor ECM

605 adhesion of MDA-MB-134 cells makes them a less suitable choice for such future studies  
606 compared to the remaining ILC cell lines.

607

608 Given their dyscohesive morphology, we expected that ILC cell lines may exhibit single cell  
609 migration as opposed to the collective migration of cell lines such as MCF7. To our surprise,  
610 however, in traditional wound-scratch assays, ILC cells exhibited a remarkable inability to  
611 robustly migrate even with PKC or Akt activation. This result may be due to their lack of  
612 adherens junctions, which makes it difficult to grow them into a complete monolayer and likely  
613 prevents them from experiencing the same loss of cell polarity at the wound edge as IDC cells. In  
614 transwell Boyden chambers, ILC cell lines did not exhibit substantial migration or invasion  
615 except for haptotaxis of SUM44 and MDA-MB-330 cells to Collagen I, which was consistent  
616 with their matrix adhesion properties and highlights the need for incorporating ECM proteins  
617 into such assays. While our attempts at studying amoeboid invasion of ILC cells in non-  
618 crosslinked Collagen I did not reveal much movement towards FBS, there is a clear need for  
619 more sophisticated, alternative assays using micro-patterned surfaces and stromal cell types such  
620 as fibroblasts to generate physiologically-relevant confined spaces and ECM tracks (43,44).

621

622 Our transcriptional comparison of ILC and IDC cell lines confirmed previously known  
623 differences in E-cadherin-mediated cell-cell junctions, cell proliferation and expression of  
624 transmembrane receptor tyrosine kinases such as *FGFR1* (6,30,40). In addition, this analysis  
625 revealed a number of novel differences in pathways such as ion channel activity, drug  
626 metabolism cytochrome P450 and extracellular structure and organization. Interestingly, one  
627 pathway upregulated in ILC versus IDC cell lines was related to cell-cell adhesion and consisted  
628 of genes such as *CDH2*, which encodes N-cadherin. This pathway may provide alternative cell-  
629 cell communication in the absence of E-cadherin and may be indicative of a partial epithelial-to-  
630 mesenchymal transition in ILC, a result consistent with the recent RATHER report on ILC  
631 tumors (9). Collectively, the genes and pathways we identified may account for the divergent  
632 biological phenotypes of the ILC and IDC cell lines we observed throughout our studies.

633

634 Overlaying the gene expression data from ILC and IDC cell lines with that from tumors, we  
635 observed a completely separate clustering and very little overlap. This phenomenon has  
636 previously been reported for ovarian cancer (45) and is not surprising given the much higher  
637 complexity of *in vivo* settings compared to *in vitro* (15,46). Future gene expression profiling  
638 studies of the cell lines cultured on ECM proteins analyzed in our study and/or in the presence of  
639 stromal cell types such as fibroblasts should yield a better recapitulation of tumor transcriptional  
640 programs. Nevertheless, our analysis identified a number of differentially regulated genes that  
641 were common between the cell lines and tumors, some of which exhibited a significant  
642 correlation with disease-free survival of ILC but not IDC tumors. This approach helped generate  
643 a short list of clinically relevant genes that may be pertinent to the unique ILC biology.

644

645 *PPFIBP2*, also known as Liprin Beta 2, encodes a protein involved in the plasma membrane  
646 recruitment of leukocyte common antigen-related receptor (LAR) protein-tyrosine phosphatases,  
647 which regulate focal adhesions and mammary gland development (47). It is commonly fused to  
648 oncogenes such as RET in thyroid cancer and the hypo-methylation of its enhancer is associated  
649 with increased breast cancer risk (48). Since our data links *PPFIB2* to poor survival specifically  
650 in the ILC cohort, further functional interrogation of this understudied, candidate oncogenic  
651 driver may implicate it as a novel therapeutic target in ILC. *PLOD2* encodes an enzyme involved  
652 in the hydroxylation of lysyl residues in collagen-like peptides and ECM remodeling (49). In  
653 contrast to its promotion of metastasis in lung adenocarcinoma (50), the association of *PLOD2*  
654 with better survival specifically in the ILC cohort suggests that decreased collagen crosslinking  
655 may create a microenvironment more permissive to growth and dissemination in ILC,  
656 underlining the importance of studying amoeboid migration and invasion.

657

658 In conclusion, our comprehensive characterization of the 2D and 3D phenotypes of ER-positive  
659 human ILC lines revealed important insights into the unique biology of ILC. With increasing  
660 interest in ILC in the laboratory and a growing list of candidate disease drivers from next-  
661 generation sequencing efforts, our study will serve as an invaluable resource for the breast cancer  
662 research community and as a platform to facilitate functional validation of potential therapeutic  
663 targets towards improving the clinical outcome of patients with ILC.

664

665

666

667

668

669

## 670 **Acknowledgments**

671 The authors thank Dr. Jennifer Xavier for critical reading of the manuscript.

672

673

674

675

676

677

678

679

680

681

682

683

684



685 **References**

686

- 687 1. Rakha EA, Ellis IO. Lobular breast carcinoma and its variants. *Semin Diagn Pathol*  
688 **2010**;27:49-61
- 689 2. Siegel RL, Miller KD, Jemal A. Cancer Statistics, 2017. *CA Cancer J Clin* **2017**;67:7-30
- 690 3. Evans WP, Warren Burhenne LJ, Laurie L, O'Shaughnessy KF, Castellino RA. Invasive  
691 lobular carcinoma of the breast: mammographic characteristics and computer-aided  
692 detection. *Radiology* **2002**;225:182-9
- 693 4. Pestalozzi BC, Zahrieh D, Mallon E, Gusterson BA, Price KN, Gelber RD, *et al.* Distinct  
694 clinical and prognostic features of infiltrating lobular carcinoma of the breast: combined  
695 results of 15 International Breast Cancer Study Group clinical trials. *J Clin Oncol*  
696 **2008**;26:3006-14
- 697 5. Metzger Filho O, Giobbie-Hurder A, Mallon E, Gusterson B, Viale G, Winer EP, *et al.*  
698 Relative Effectiveness of Letrozole Compared With Tamoxifen for Patients With Lobular  
699 Carcinoma in the BIG 1-98 Trial. *J Clin Oncol* **2015**;33:2772-9
- 700 6. McCart Reed AE, Kutasovic JR, Lakhani SR, Simpson PT. Invasive lobular carcinoma of  
701 the breast: morphology, biomarkers and 'omics. *Breast Cancer Res* **2015**;17:12
- 702 7. Ciriello G, Gatza ML, Beck AH, Wilkerson MD, Rhie SK, Pastore A, *et al.*  
703 Comprehensive Molecular Portraits of Invasive Lobular Breast Cancer. *Cell*  
704 **2015**;163:506-19
- 705 8. Rakha EA, Abd El Rehim D, Pinder SE, Lewis SA, Ellis IO. E-cadherin expression in  
706 invasive non-lobular carcinoma of the breast and its prognostic significance.  
707 *Histopathology* **2005**;46:685-93
- 708 9. Michaut M, Chin SF, Majewski I, Severson TM, Bismeyer T, de Koning L, *et al.*  
709 Integration of genomic, transcriptomic and proteomic data identifies two biologically  
710 distinct subtypes of invasive lobular breast cancer. *Sci Rep* **2016**;6:18517
- 711 10. Desmedt C, Zoppoli G, Gundem G, Pruneri G, Larsimont D, Fornili M, *et al.* Genomic  
712 Characterization of Primary Invasive Lobular Breast Cancer. *J Clin Oncol* **2016**;34:1872-  
713 81
- 714 11. Sikora MJ, Cooper KL, Bahreini A, Luthra S, Wang G, Chandran UR, *et al.* Invasive  
715 lobular carcinoma cell lines are characterized by unique estrogen-mediated gene  
716 expression patterns and altered tamoxifen response. *Cancer Res* **2014**;74:1463-74
- 717 12. Rotem A, Janzer A, Izar B, Ji Z, Doench JG, Garraway LA, *et al.* Alternative to the soft-  
718 agar assay that permits high-throughput drug and genetic screens for cellular  
719 transformation. *Proc Natl Acad Sci U S A* **2015**;112:5708-13
- 720 13. Macpherson I, Montagnier L. Agar Suspension Culture for the Selective Assay of Cells  
721 Transformed by Polyoma Virus. *Virology* **1964**;23:291-4
- 722 14. Lee GY, Kenny PA, Lee EH, Bissell MJ. Three-dimensional culture models of normal  
723 and malignant breast epithelial cells. *Nat Methods* **2007**;4:359-65



- 724 15. Stock K, Estrada MF, Vidic S, Gjerde K, Rudisch A, Santo VE, *et al.* Capturing tumor  
725 complexity in vitro: Comparative analysis of 2D and 3D tumor models for drug  
726 discovery. *Sci Rep* **2016**;6:28951
- 727 16. Yue J, Zhang K, Chen J. Role of integrins in regulating proteases to mediate extracellular  
728 matrix remodeling. *Cancer Microenviron* **2012**;5:275-83
- 729 17. Justus CR, Leffler N, Ruiz-Echevarria M, Yang LV. In vitro cell migration and invasion  
730 assays. *J Vis Exp* **2014**
- 731 18. Carter SB. Haptotaxis and the mechanism of cell motility. *Nature* **1967**;213:256-60
- 732 19. Friedl P, Wolf K. Tumour-cell invasion and migration: diversity and escape mechanisms.  
733 *Nat Rev Cancer* **2003**;3:362-74
- 734 20. Sahai E, Marshall CJ. Differing modes of tumour cell invasion have distinct requirements  
735 for Rho/ROCK signalling and extracellular proteolysis. *Nat Cell Biol* **2003**;5:711-9
- 736 21. Fellmann C, Hoffmann T, Sridhar V, Hopfgartner B, Muhar M, Roth M, *et al.* An  
737 optimized microRNA backbone for effective single-copy RNAi. *Cell Rep* **2013**;5:1704-  
738 13
- 739 22. Du T ZL, Levine KM, Tasdemir N, Lee AV, Houten BV, Tseng GC, Oesterreich S.  
740 Invasive lobular and ductal breast carcinoma differ in immune response, protein  
741 translation efficiency and metabolism. *Sci Rep* **2018**;Accepted
- 742 23. Manni A, Wright C, Buck H. Growth factor involvement in the multihormonal regulation  
743 of MCF-7 breast cancer cell growth in soft agar. *Breast Cancer Res Treat* **1991**;20:43-52
- 744 24. Lombardo Y, de Giorgio A, Coombes CR, Stebbing J, Castellano L. Mammosphere  
745 formation assay from human breast cancer tissues and cell lines. *J Vis Exp* **2015**
- 746 25. Liang CC, Park AY, Guan JL. In vitro scratch assay: a convenient and inexpensive  
747 method for analysis of cell migration in vitro. *Nat Protoc* **2007**;2:329-33
- 748 26. Kramer N, Walzl A, Unger C, Rosner M, Krupitza G, Hengstschlager M, *et al.* In vitro  
749 cell migration and invasion assays. *Mutat Res* **2013**;752:10-24
- 750 27. Marcotte R, Sayad A, Brown KR, Sanchez-Garcia F, Reimand J, Haider M, *et al.*  
751 Functional Genomic Landscape of Human Breast Cancer Drivers, Vulnerabilities, and  
752 Resistance. *Cell* **2016**;164:293-309
- 753 28. Curtis C, Shah SP, Chin SF, Turashvili G, Rueda OM, Dunning MJ, *et al.* The genomic  
754 and transcriptomic architecture of 2,000 breast tumours reveals novel subgroups. *Nature*  
755 **2012**;486:346-52
- 756 29. Dai X, Cheng H, Bai Z, Li J. Breast Cancer Cell Line Classification and Its Relevance  
757 with Breast Tumor Subtyping. *J Cancer* **2017**;8:3131-41
- 758 30. Christgen M, Derksen P. Lobular breast cancer: molecular basis, mouse and cellular  
759 models. *Breast Cancer Res* **2015**;17:16
- 760 31. Hollestelle A, Peeters JK, Smid M, Timmermans M, Verhoog LC, Westenend PJ, *et al.*  
761 Loss of E-cadherin is not a necessity for epithelial to mesenchymal transition in human  
762 breast cancer. *Breast Cancer Res Treat* **2013**;138:47-57

- 763 32. Shibata T, Kokubu A, Sekine S, Kanai Y, Hirohashi S. Cytoplasmic p120<sup>ctn</sup> regulates  
764 the invasive phenotypes of E-cadherin-deficient breast cancer. *Am J Pathol*  
765 **2004**;164:2269-78
- 766 33. Schackmann RC, van Amersfoort M, Haarhuis JH, Vlug EJ, Halim VA, Roodhart JM, *et*  
767 *al.* Cytosolic p120-catenin regulates growth of metastatic lobular carcinoma through  
768 Rock1-mediated anoikis resistance. *J Clin Invest* **2011**;121:3176-88
- 769 34. Zhao H, Langerod A, Ji Y, Nowels KW, Nesland JM, Tibshirani R, *et al.* Different gene  
770 expression patterns in invasive lobular and ductal carcinomas of the breast. *Mol Biol Cell*  
771 **2004**;15:2523-36
- 772 35. Bertucci F, Orsetti B, Negre V, Finetti P, Rouge C, Ahomadegbe JC, *et al.* Lobular and  
773 ductal carcinomas of the breast have distinct genomic and expression profiles. *Oncogene*  
774 **2008**;27:5359-72
- 775 36. Manuel Iglesias J, Beloqui I, Garcia-Garcia F, Leis O, Vazquez-Martin A, Eguiara A, *et*  
776 *al.* Mammosphere formation in breast carcinoma cell lines depends upon expression of E-  
777 cadherin. *PLoS One* **2013**;8:e77281
- 778 37. Kenny PA, Lee GY, Myers CA, Neve RM, Semeiks JR, Spellman PT, *et al.* The  
779 morphologies of breast cancer cell lines in three-dimensional assays correlate with their  
780 profiles of gene expression. *Mol Oncol* **2007**;1:84-96
- 781 38. Sumagin R, Robin AZ, Nusrat A, Parkos CA. Activation of PKC $\beta$ II by PMA  
782 facilitates enhanced epithelial wound repair through increased cell spreading and  
783 migration. *PLoS One* **2013**;8:e55775
- 784 39. Samuels Y, Diaz LA, Jr., Schmidt-Kittler O, Cummins JM, Delong L, Cheong I, *et al.*  
785 Mutant PIK3CA promotes cell growth and invasion of human cancer cells. *Cancer Cell*  
786 **2005**;7:561-73
- 787 40. Reis-Filho JS, Simpson PT, Turner NC, Lambros MB, Jones C, Mackay A, *et al.* FGFR1  
788 emerges as a potential therapeutic target for lobular breast carcinomas. *Clin Cancer Res*  
789 **2006**;12:6652-62
- 790 41. Derksen PW, Liu X, Saridin F, van der Gulden H, Zevenhoven J, Evers B, *et al.* Somatic  
791 inactivation of E-cadherin and p53 in mice leads to metastatic lobular mammary  
792 carcinoma through induction of anoikis resistance and angiogenesis. *Cancer Cell*  
793 **2006**;10:437-49
- 794 42. Mori S, Chang JT, Andrechek ER, Matsumura N, Baba T, Yao G, *et al.* Anchorage-  
795 independent cell growth signature identifies tumors with metastatic potential. *Oncogene*  
796 **2009**;28:2796-805
- 797 43. Paul CD, Mistriotis P, Konstantopoulos K. Cancer cell motility: lessons from migration  
798 in confined spaces. *Nat Rev Cancer* **2017**;17:131-40
- 799 44. Gaggioli C, Hooper S, Hidalgo-Carcedo C, Grosse R, Marshall JF, Harrington K, *et al.*  
800 Fibroblast-led collective invasion of carcinoma cells with differing roles for RhoGTPases  
801 in leading and following cells. *Nat Cell Biol* **2007**;9:1392-400

- 802 45. Domcke S, Sinha R, Levine DA, Sander C, Schultz N. Evaluating cell lines as tumour  
803 models by comparison of genomic profiles. *Nat Commun* **2013**;4:2126
- 804 46. Abbott A. Cell culture: biology's new dimension. *Nature* **2003**;424:870-2
- 805 47. Sarhan AR, Patel TR, Cowell AR, Tomlinson MG, Hellberg C, Heath JK, *et al.* LAR  
806 protein tyrosine phosphatase regulates focal adhesions through CDK1. *J Cell Sci*  
807 **2016**;129:2962-71
- 808 48. Wang Y, Hao DP, Li JJ, Wang L, Di LJ. Genome-wide methylome and chromatin  
809 interactome identify abnormal enhancer to be risk factor of breast cancer. *Oncotarget*  
810 **2017**;8:44705-19
- 811 49. Rautavuoma K, Takaluoma K, Passoja K, Pirskanen A, Kvist AP, Kivirikko KI, *et al.*  
812 Characterization of three fragments that constitute the monomers of the human lysyl  
813 hydroxylase isoenzymes 1-3. The 30-kDa N-terminal fragment is not required for lysyl  
814 hydroxylase activity. *J Biol Chem* **2002**;277:23084-91
- 815 50. Du H, Chen Y, Hou X, Huang Y, Wei X, Yu X, *et al.* PLOD2 regulated by transcription  
816 factor FOXA1 promotes metastasis in NSCLC. *Cell Death Dis* **2017**;8:e3143
- 817  
818  
819  
820  
821  
822  
823  
824  
825  
826  
827  
828  
829  
830  
831  
832  
833  
834  
835  
836  
837  
838  
839  
840  
841

842 **Figure Legends**

843

844 **Figure 1. Characteristics of the human ILC and IDC cell lines used in the study.**

845

846 **A.** Western blotting using the indicated antibodies on whole cell lysates from ILC (left; red) and  
847 IDC (right; blue) cell lines.  $\beta$ -Actin was used as a loading control. **B.** Merged images of co-  
848 immunofluorescence staining for E-cadherin (red) and p120 (green) in ILC (top) and IDC  
849 (bottom) cell lines. DAPI (blue) was used for counterstaining to mark nuclei. Arrows indicate  
850 cytoplasmic co-localization of E-cadherin and p120 in MDA-MB-330 cells. Scale bar: 10  $\mu$ m.

851

852

853 **Figure 2. Human ILC cell lines exhibit superior growth in ULA culture than human IDC**  
854 **cell lines.**

855

856 **A.** Phase contrast light microscopy images of ILC (red; top) and IDC (blue; bottom) cell lines in  
857 6-well 2D and ULA plates 4 days post plating. Scale bar: 100  $\mu$ m. **B.** Relative growth curves  
858 showing fold growth normalized to day 0 at each time point over 6 days for ILC (red; left) and  
859 IDC (blue; right). Graphs show representative data from three experiments (n=6). p-values are  
860 two-way ANOVA comparison of 2D and ULA. \*  $p \leq 0.05$ ; \*\*\*\*  $p \leq 0.0001$ .

861

862

863 **Figure 3. ILC and IDC cell lines exhibit varying morphologies in 3D culture.**

864

865 Phase contrast light microscopy images of **(A)** ILC (red) and **(B)** IDC (blue) cell lines in soft  
866 agar (4 weeks post plating), Collagen I, Matrigel embedded and Matrigel on-top culture (ILC: 3  
867 weeks post plating; IDC: 1 week post plating). Scale bar: 100  $\mu$ m.

868

869

870 **Figure 4. Human ILC cell lines have differing preferences for adhesion to ECM proteins.**

871

872 **A.** Phase contrast light microscopy images of ILC (red; left) and IDC (blue; right) cell lines in  
873 uncoated, Collagen I or BSA-coated plates 16 hours post-plating. Scale bar: 100  $\mu$ m. **B.** Fold  
874 adhesion (normalized to BSA) of ILC (red) and IDC (blue) cell lines 16 hours post-plating.  
875 Graphs show representative data from two experiments (n=4). p-values are from ordinary one-  
876 way ANOVA with Dunnett's multiple comparison test to uncoated conditions for each cell line.  
877 \*  $p \leq 0.05$ ; \*\*  $p \leq 0.01$ ; \*\*\*\*  $p \leq 0.0001$ .

878

879

880

881

882 **Figure 5. Human ILC cell exhibit limited migration ability in wound-scratch assays.**

883  
884 **A.** Snapshots of the scratch wounds in ILC (red; left) and IDC (blue; right) cell lines at the  
885 indicated time points. Scale bar: 100  $\mu$ m. **B.** Snapshots of the scratch wounds in BCK4 (red) and  
886 MCF7 (blue) cell lines treated with 100 nM PMA. Arrows indicate migratory protrusions at the  
887 wound edge. Scale bar: 300  $\mu$ m. **C.** Relative wound densities over hour 0 in ILC (red; left) and  
888 IDC (blue; right) cell lines over time with and without PMA treatment. Graphs shows  
889 representative data from two-three experiments (n=6-8). p-values are from two-way ANOVA  
890 comparison of -PMA vs +PMA. \*  $p \leq 0.05$ ; \*\*\*\*  $p \leq 0.0001$ .

891  
892  
893 **Figure 6. Human ILC cell lines exhibit limited migration and invasion towards FBS but**  
894 **SUM44 and MDA-MB-330 exhibit haptotaxis to Collagen I in transwell Boyden chamber**  
895 **assays.**

896  
897 **A-D.** Images (top) and quantification (bottom) of crystal violet-stained inserts with ILC (red;  
898 left) and IDC (blue; right) cell lines from (A) Chemotaxis (B) Haptotaxis (C) Collagen I invasion  
899 and (D) Matrigel invasion assays towards the indicated attractants after 72 hours. Graphs show  
900 representative data from two independent experiments (n=3 biological replicates). p-values are  
901 from unpaired t-test. \*  $p \leq 0.05$ ; \*\*  $p \leq 0.01$ ; \*\*\*  $p \leq 0.001$ ; \*\*\*\*  $p \leq 0.0001$ .

902  
903  
904 **Figure 7. Transcriptional differences between human ILC and IDC cell lines and tumors.**

905  
906 **A.** Supervised clustering heat map of ILC (red) and IDC (blue) cell lines using differentially  
907 expressed genes. **B-C.** Lists of representative (B) upregulated and (C) downregulated pathways  
908 and genes in ILC versus IDC cell lines. q-values are from Fisher's exact test with FDR<0.05. **D-**  
909 **E.** Venn diagrams (D) and lists (E) of commonly upregulated and downregulated genes between  
910 ILC and IDC cell lines and tumors. **F.** Disease-specific survival curves for PPFIBP2 (top) and  
911 PLOD2 (bottom) in ER+, Luminal A ILC (red; left) and IDC (blue; right) patients in the  
912 METABRIC dataset. Patients were divided into two groups by PPFIBP2 (q3: third quadrant) and  
913 PLOD2 (q1: first quadrant) expression. p-values are from log-rank test. q-values were calculated  
914 using the Benjamini-Hochberg method to correct p-values for multiple comparisons testing  
915 within histology. The small ILC sample size (n=60) allows for limited statistical power in  
916 detecting survival differences after multiple testing correction.

917

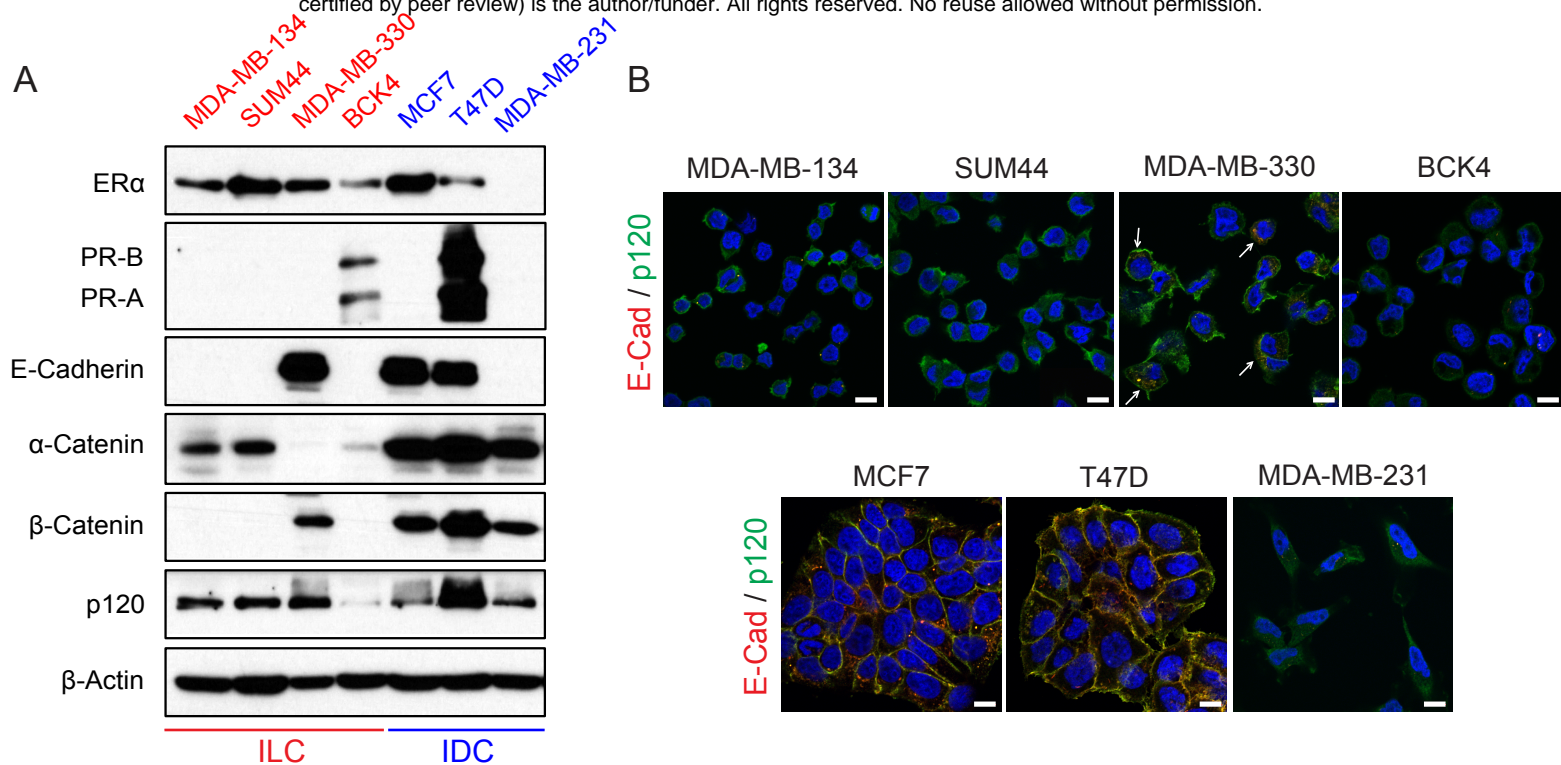

**Figure 1. Characteristics of the human ILC and IDC cell lines used in the study. A.** Western blotting using the indicated antibodies on whole cell lysates from ILC (left; red) and IDC (right; blue) cell lines.  $\beta$ -Actin was used as a loading control. **B.** Merged images of co-immunofluorescence staining for E-cadherin (red) and p120 (green) in ILC (top) and IDC (bottom) cell lines. DAPI (blue) was used for counterstaining to mark nuclei. Arrows indicate cytoplasmic co-localization of E-cadherin and p120 in MDA-MB-330 cells. Scale bar: 10  $\mu$ m.



A

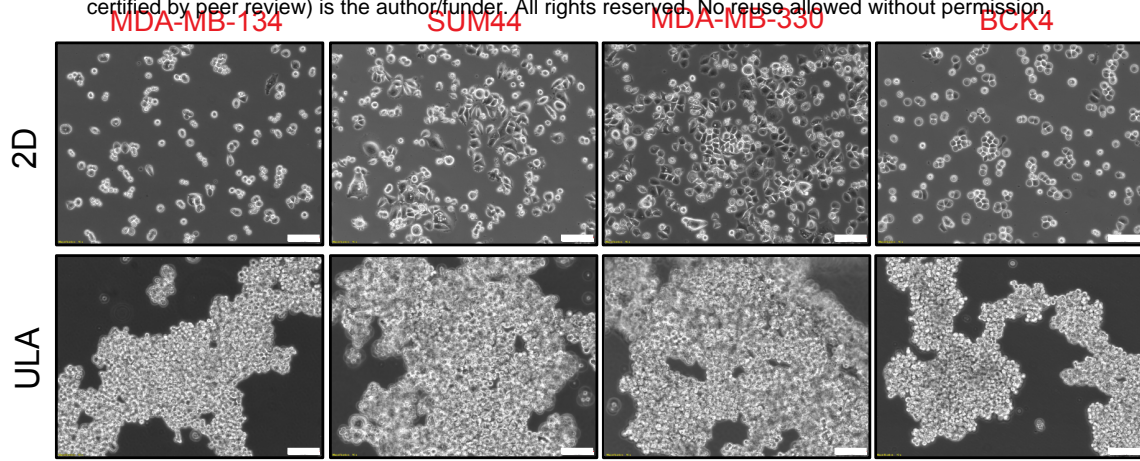

B

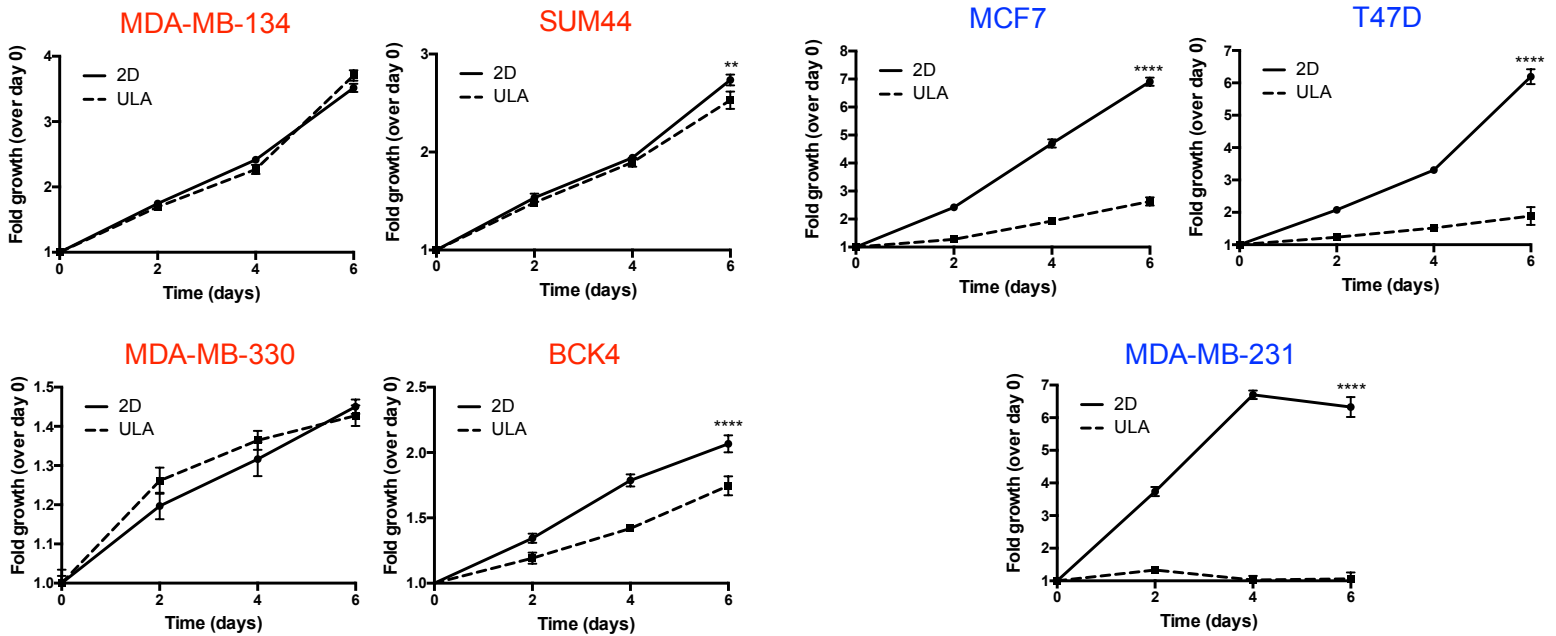

**Figure 2. Human ILC cell lines exhibit superior growth in ULA culture than human IDC cell lines. A.** Phase contrast light microscopy images of ILC (red; top) and IDC (blue; bottom) cell lines in 6-well 2D and ULA plates 4 days post plating. Scale bar: 100 μm. **B.** Relative growth curves showing fold growth normalized to day 0 at each time point over 6 days for ILC (red; left) and IDC (blue; right). Graphs show representative data from three experiments (n=6). p-values are from two-way ANOVA comparison of 2D and ULA. \*\* p ≤ 0.01; \*\*\*\* p ≤ 0.0001.



A

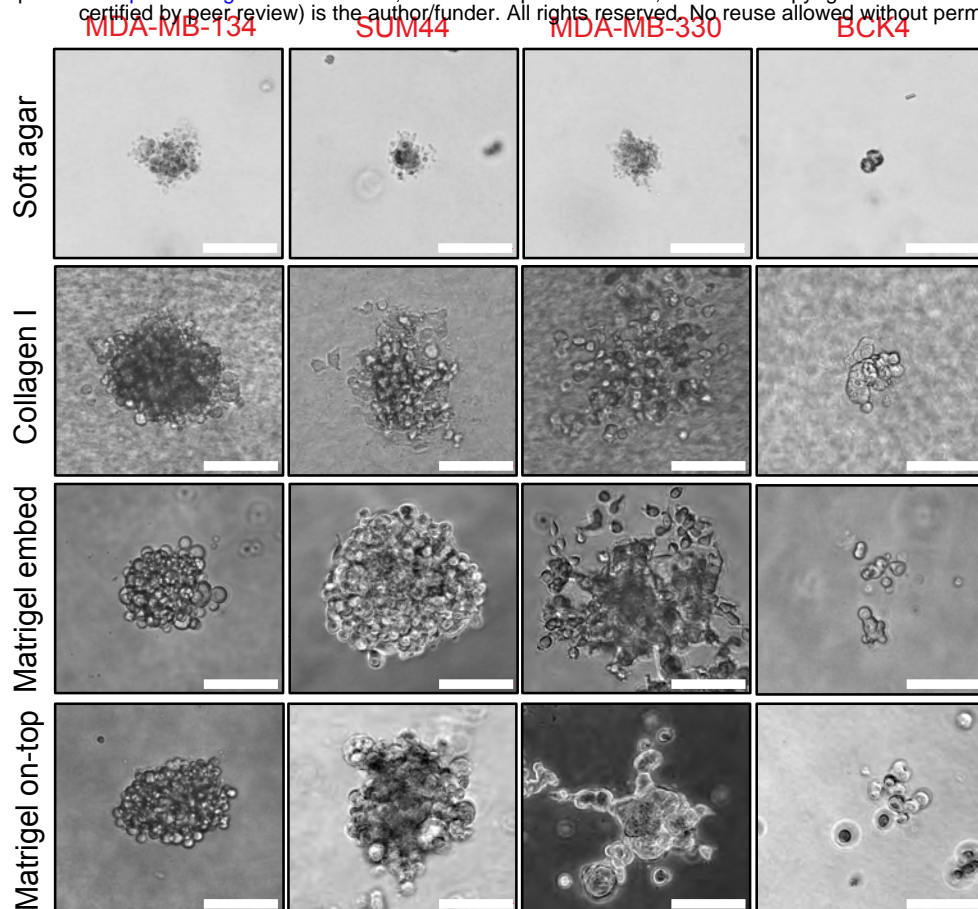

B

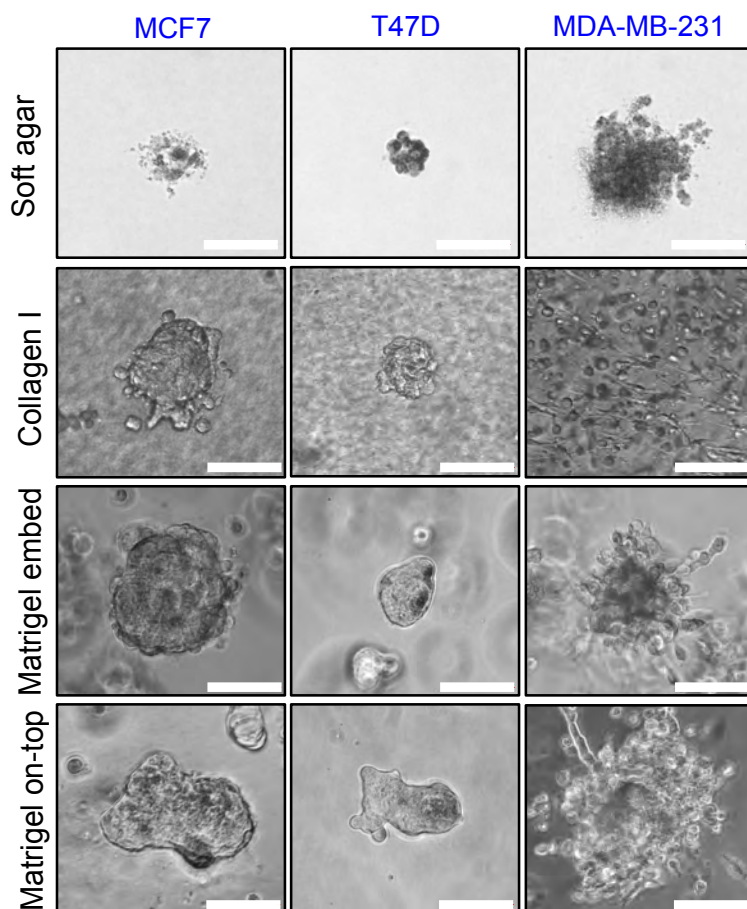

**Figure 3. ILC and IDC cell lines exhibit varying morphologies in 3D culture.** Phase contrast light microscopy images of (A) ILC (red) and (B) IDC (blue) cell lines in soft agar (4 weeks post plating), Collagen I, Matrigel embedded and Matrigel on-top culture (ILC: 3 weeks post plating; IDC: 1 week post plating). Scale bar: 100  $\mu$ m.

A

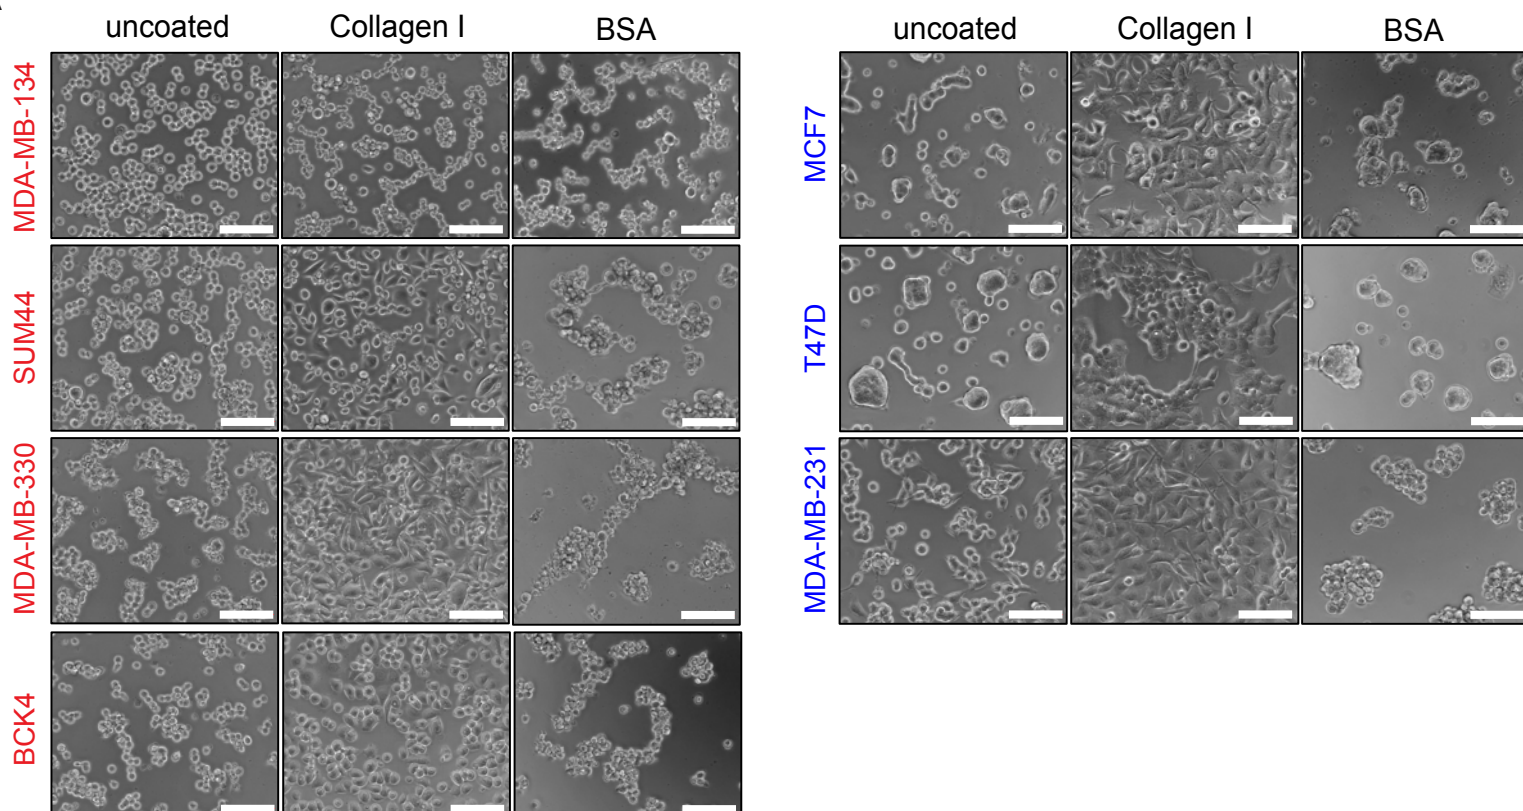

B

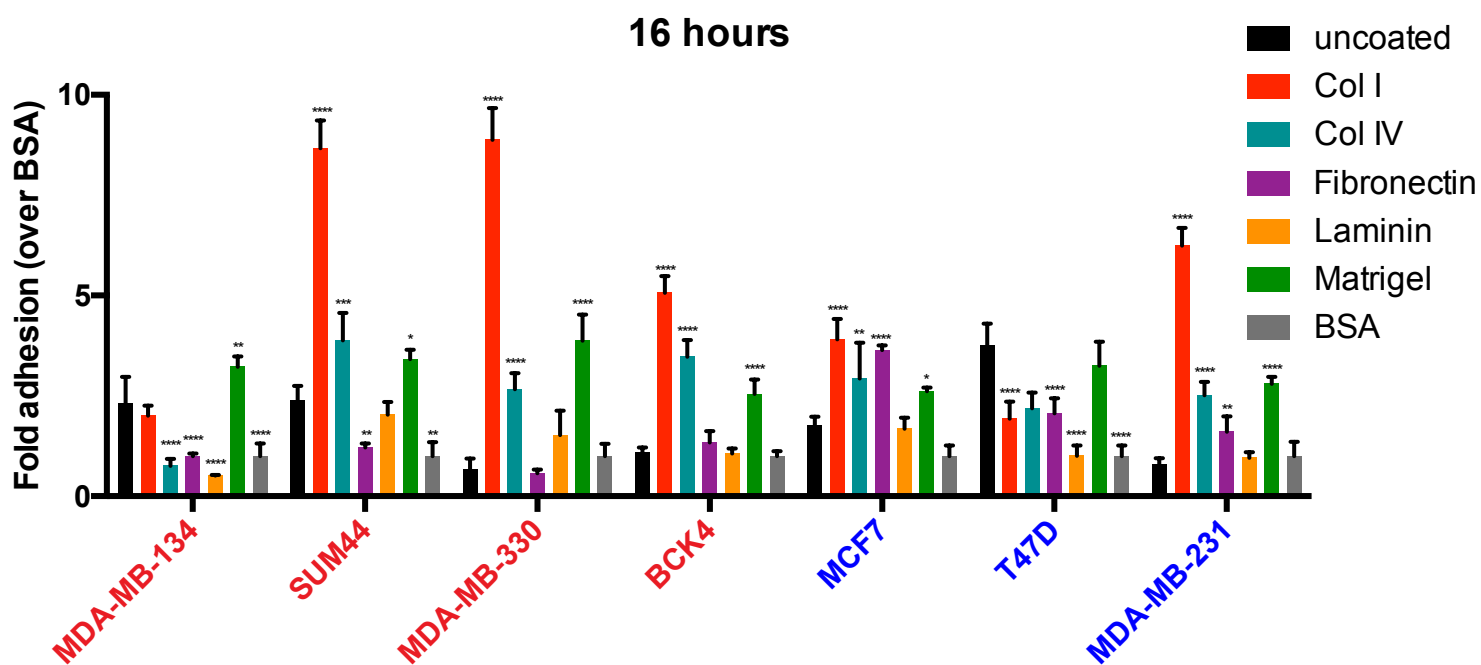

**Figure 4. Human ILC cell lines have differing preferences for adhesion to ECM proteins. A.** Phase contrast light microscopy images of ILC (red; left) and IDC (blue; right) cell lines in uncoated, Collagen I or BSA-coated plates 16 hours post-plating. Scale bar: 100 μm. **B.** Fold adhesion (normalized to BSA) of ILC (red) and IDC (blue) cell lines 16 hours post-plating. Graph shows representative data from two experiments (n=4). p-values are from ordinary one-way ANOVA with Dunnett's multiple comparison test to uncoated conditions for each cell line. \* p ≤ 0.05; \*\* p ≤ 0.01; \*\*\*\* p ≤ 0.0001.



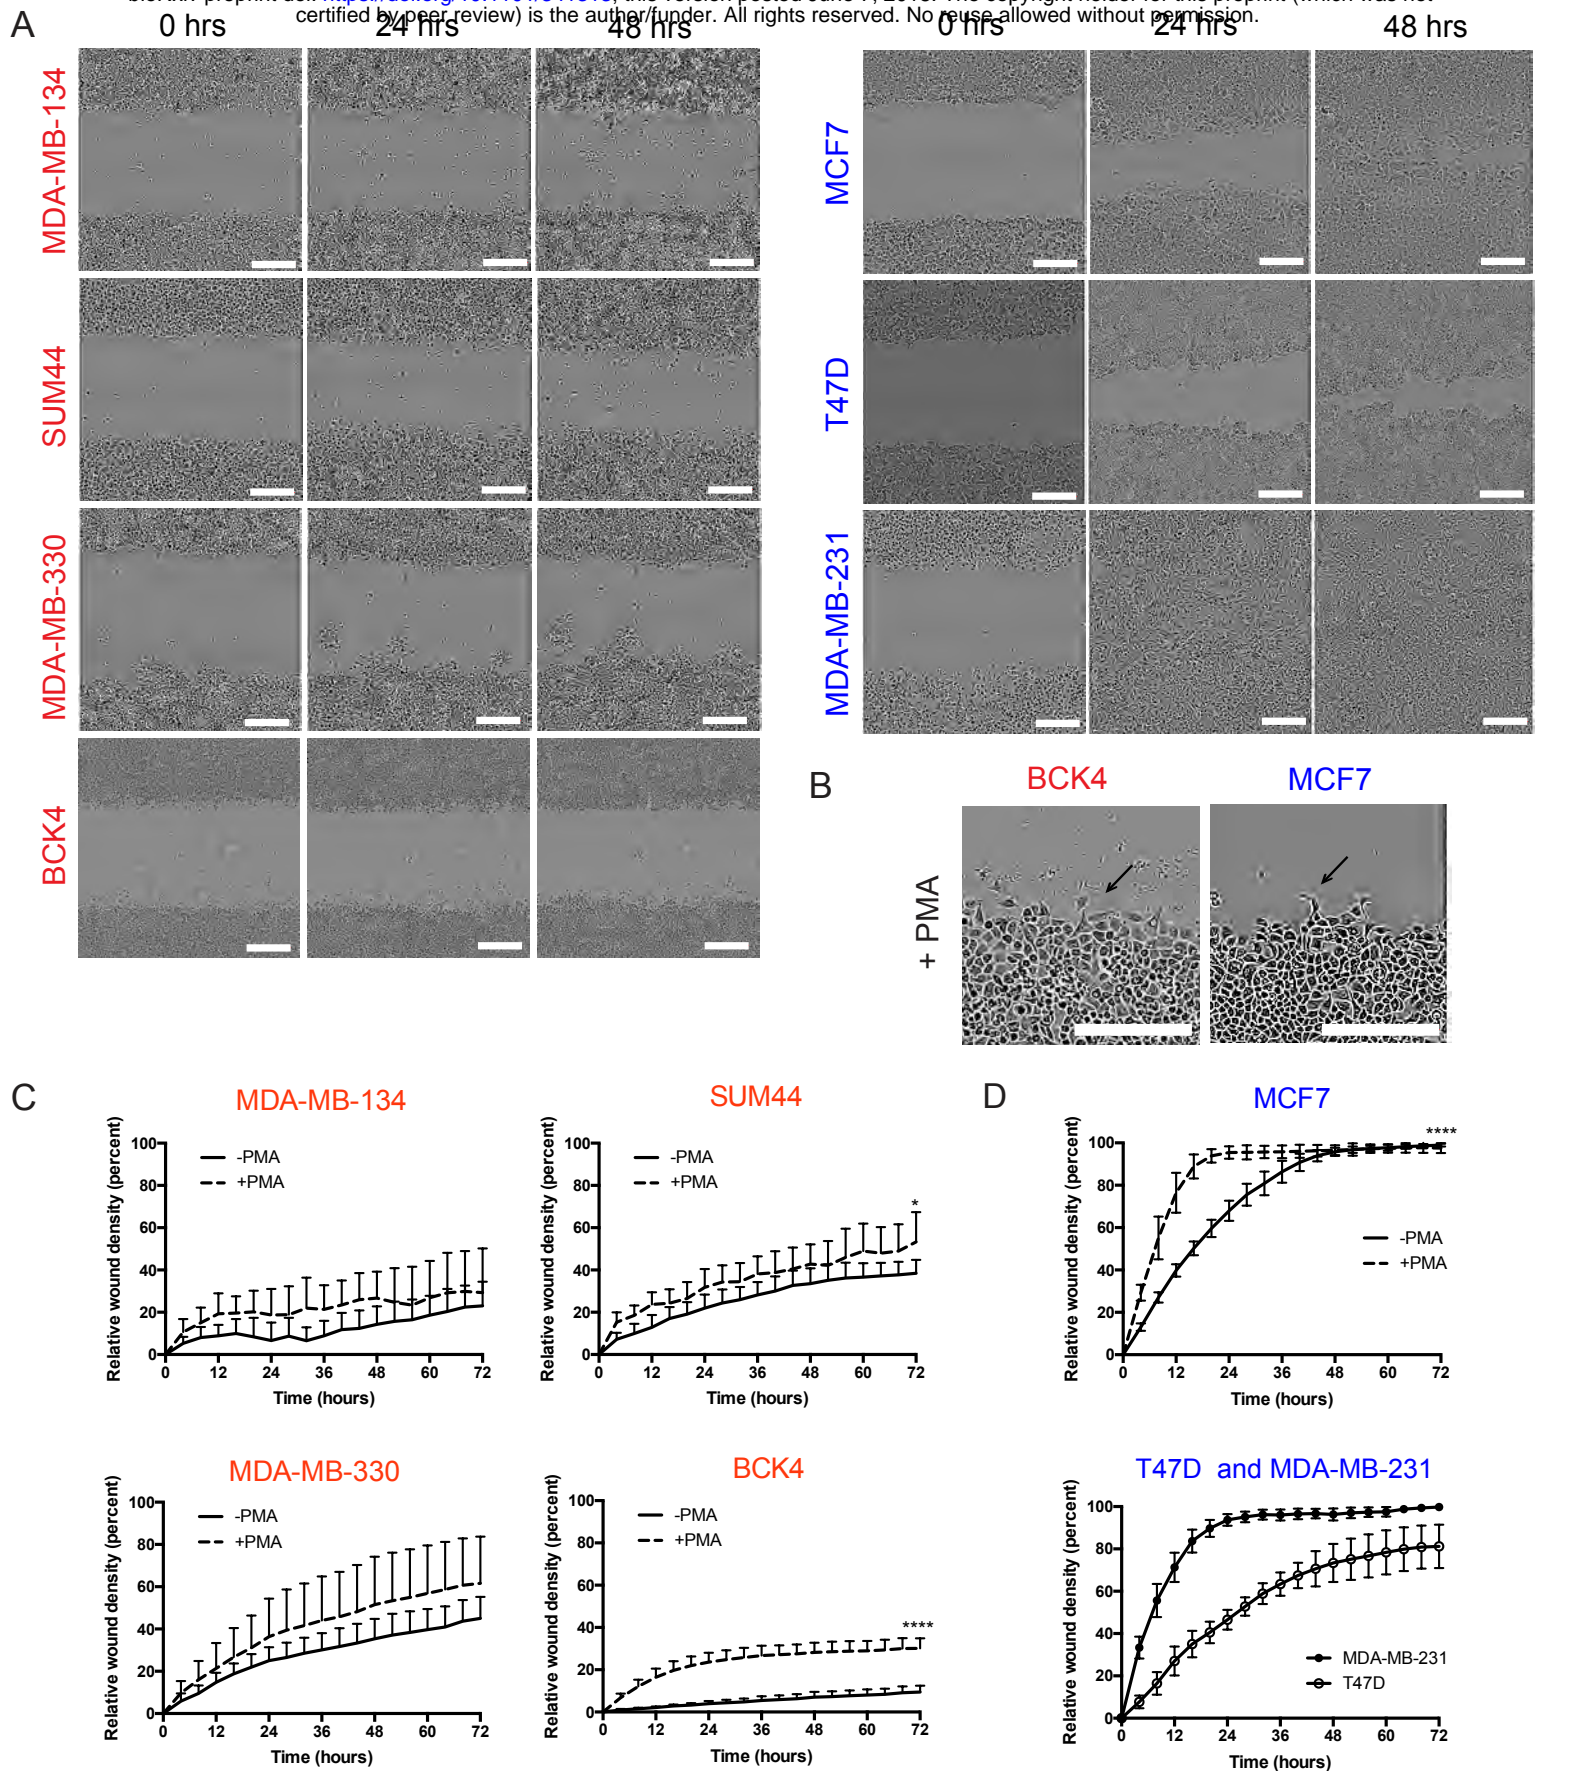

**Figure 5. Human ILC cell lines exhibit limited migration ability in wound-scratch assays.** **A.** Snapshots of the scratch wounds in ILC (red; left) and IDC (blue; right) cell lines at the indicated time points. Scale bar: 100  $\mu$ m. **B.** Snapshots of the scratch wounds in BCK4 (red) and MCF7 (blue) cell lines treated with 100 nM PMA. Arrows indicate migratory protrusions at the wound edge. Scale bar: 300  $\mu$ m. **C-D.** Relative wound densities over hour 0 in **(C)** ILC (red) and **(D)** IDC (blue) cell lines over time with and without PMA treatment. Graphs show representative data from two-three experiments ( $n=6-8$ ).  $p$ -values are from two-way ANOVA comparison of -PMA vs +PMA. \*  $p \leq 0.05$ ; \*\*\*\*  $p \leq 0.0001$ .

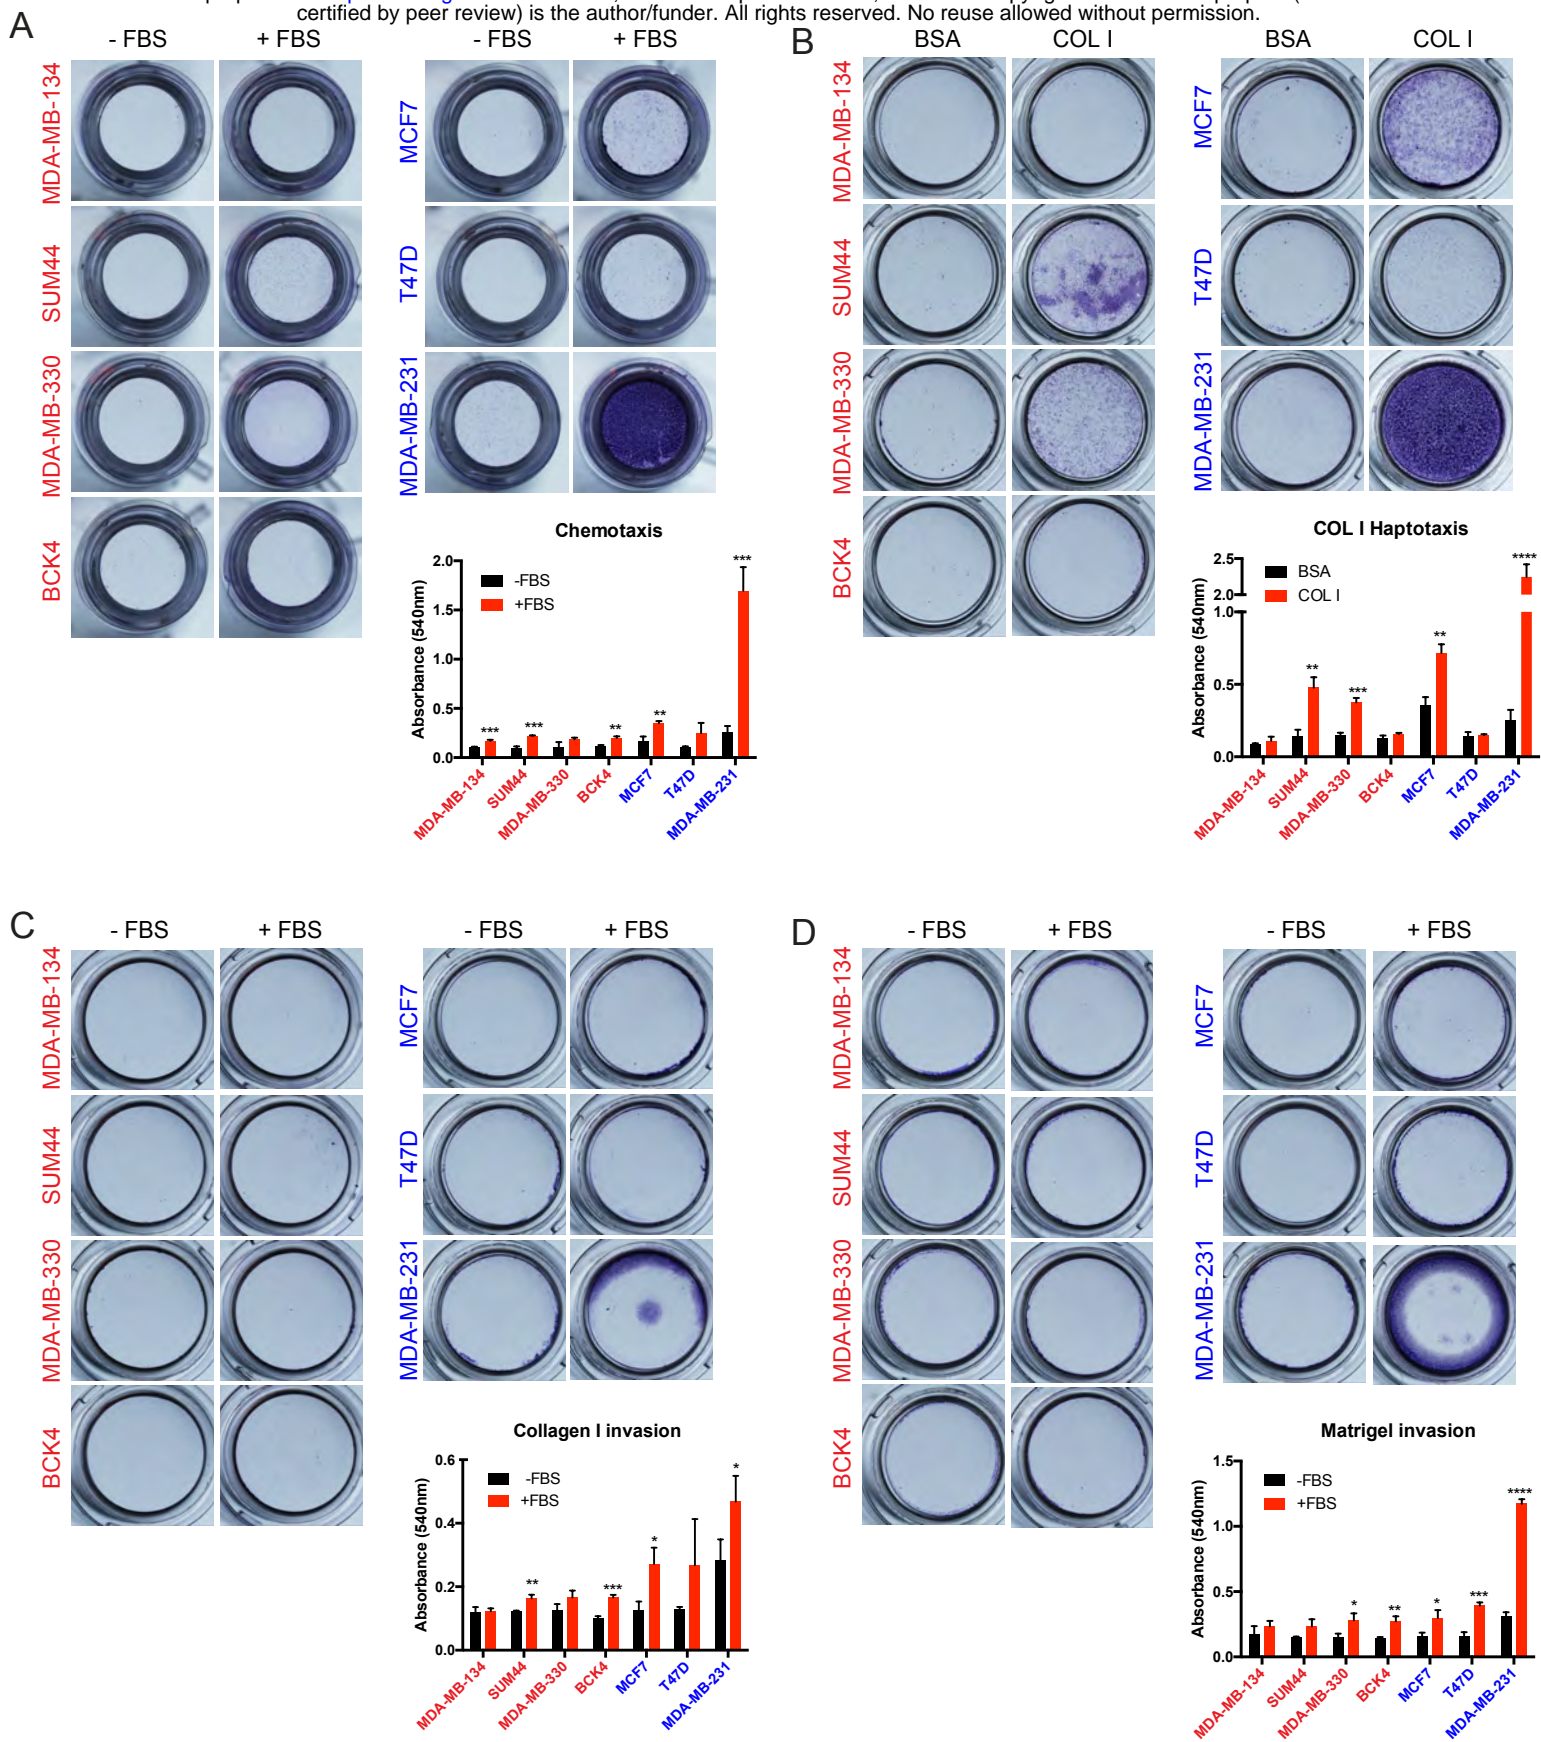

**Figure 6. Human ILC cell lines exhibit limited migration and invasion towards FBS but SUM44 and MDA-MB-330 exhibit haptotaxis to Collagen I in transwell Boyden chamber assays.** Images (top) and quantification (bottom) of crystal violet-stained inserts with ILC (red; left) and IDC (blue; right) cell lines from (A) Chemotaxis (B) Haptotaxis (C) Collagen I invasion and (D) Matrigel invasion assays towards the indicated attractants after 72 hours. Graphs shows representative data from two independent experiments (n=3 biological replicates). p-values are from unpaired t-test. \*  $p \leq 0.05$ ; \*\*  $p \leq 0.01$ ; \*\*\*  $p \leq 0.001$ ; \*\*\*\*  $p \leq 0.0001$ .



A

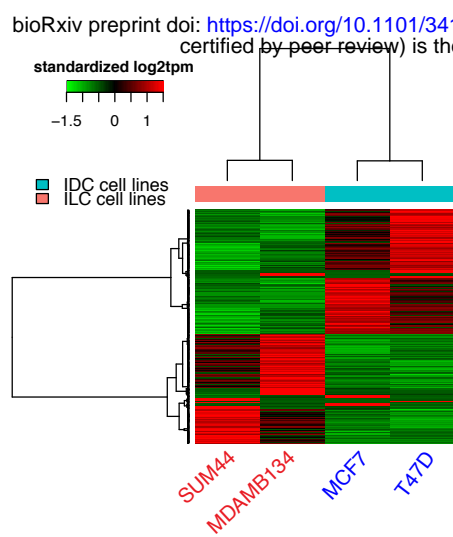

B

### Pathways upregulated in ILC vs IDC cells

| Pathway                                        | Genes                        | q-value |
|------------------------------------------------|------------------------------|---------|
| Ion channel activity                           | CACNA1C, CLCA2, KCNC1, KCND3 | 0.001   |
| Tyrosine metabolism                            | DDC, HGD, MAOB, TAT          | 0.001   |
| Biological oxidations                          | CYP4F3, GCLM, GSTA4, PTGIS   | 0.001   |
| Cyclic nucleotide phosphodiesterase activity   | PDE10A, PDE4B, PDE7B         | 0.007   |
| Drug metabolism<br>Cytochrome P450             | ALDH3B2, GSTM1, UGT1A4       | 0.007   |
| Cell adhesion molecules                        | CDH2, CNTNAP2, NFASC, NRXN1  | 0.008   |
| Transmembrane protein tyrosine kinase activity | FGFR1, FGFR4, FLT3, ROR1     | 0.008   |

C

### Pathways downregulated in ILC vs IDC cells

| Pathway                                  | Genes                           | q-value  |
|------------------------------------------|---------------------------------|----------|
| Interferon signaling                     | HERC5, HLA-DRB1, ICAM1, ISG15   | 1.88E-07 |
| Amyloids                                 | GSN, HIST1H2BC, HIST2H4A, TGFBI | 3.46E-06 |
| RNA Pol I transcription                  | HIST1H2BK, HIST1H3H, TAF1C      | 7.30E-05 |
| Extracellular structure and organization | AGRN, PCDHB11, PCDHB9, SPINK5   | 0.0005   |
| Regulation of cell proliferation         | EGFR, FLT4, LIF, TBX2, TIMP1    | 0.002    |
| Intercellular junction                   | CDH1, CLDN1, AMOTL1, GJB2       | 0.008    |
| Focal adhesion                           | CAV1, CAV2, COL5A1, MYL9        | 0.008    |

D

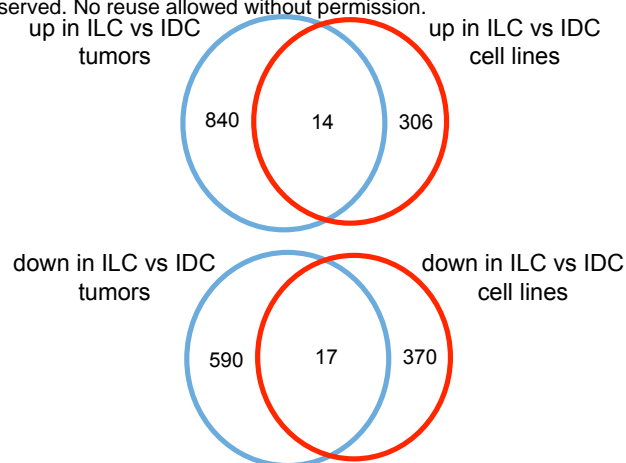

E

### Genes commonly regulated in both cell lines and tumors

| up     |         |        | down   |          |          |
|--------|---------|--------|--------|----------|----------|
| TFAP2B | CCR2    | CPXM2  | CDH1   | HIST1H3H | TGFBI    |
| BBOX1  | PDE4B   | CX3CR1 | WDR72  | ISG15    | C16orf45 |
| TSPAN7 | CPEB1   | PDE7B  | KCNF1  | GJB2     | PXDN     |
| CLEC3B | RASSF6  | NR3C2  | EEF1A2 | CYP27B1  | DPP3     |
| PTGIS  | PPFIBP2 |        | SULF1  | PGR      | APRT     |
|        |         |        | PLOD2  | PCDHGB4  |          |

F

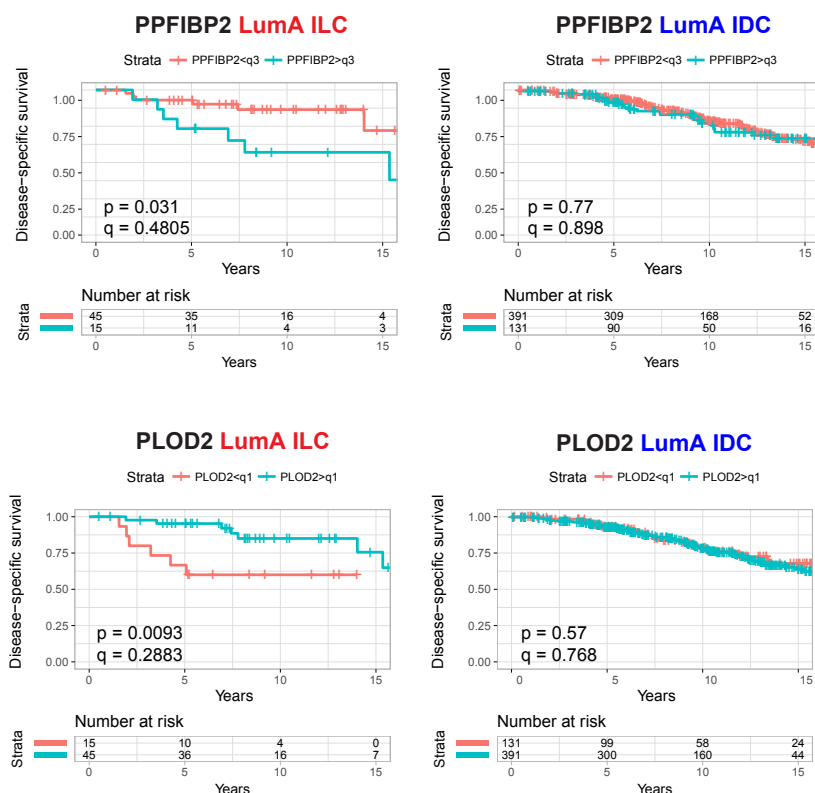

**Figure 7. Transcriptional differences between human ILC and IDC cell lines and tumors.** **A.** Supervised clustering heat map of ILC (red) and IDC (blue) cell lines using differentially expressed genes. **B-C.** Lists of representative (**B**) upregulated and (**C**) downregulated pathways and genes in ILC vs IDC cell lines. q-values are from Fisher's exact test with FDR<0.05. **D-E.** Venn diagrams (**D**) and lists (**E**) of commonly upregulated and downregulated genes between ILC and IDC cell lines and tumors. **F.** Disease-specific survival curves for PPFIBP2 (top) and PLOD2 (bottom) in ER+, Luminal A ILC (red; left) and IDC (blue; right) patients in the METABRIC dataset. Patients were divided into two groups by PPFIBP2 (q3: third quadrant) and PLOD2 (q1: first quadrant) expression. p-values are from log-rank test. q-values were calculated using the Benjamini-Hochberg method to correct p-values for multiple comparisons testing within histology. The small ILC sample size (n=60) allows for limited statistical power in detecting survival differences after multiple testing correction.
